# Supplementary material for: Surface coating and particle size are main factors explaining the transcriptome-wide responses of the earthwormLumbricus rubellusto silver nanoparticles
Source: Royal Society of Chemistry journal article supplement (doi:10.1039/c9en01144g), 2020-01-01
Supplement: c9en01144g1.xlsx [file c9en01144g1.xlsx]

## Sheet: BSA_NP_small
SeqID_BSA	Seq_Description	BSA_small_logFC	BSA_small_FDR
comp2626_c1_seq143	---NA---	9.0234	0.0003
comp2626_c1_seq253	---NA---	7.687	0.0163
comp30262_c0_seq1	---NA---	9.9332	0.0163
comp3095_c1_seq2	---NA---	7.2812	0.0229
comp1077_c0_seq2	---NA---	4.4089	0.0229
comp30708_c0_seq1	---NA---	7.174	0.0329
comp2626_c1_seq243	---NA---	8.1198	0.0364
comp1587_c0_seq80	---NA---	3.9078	0.039
comp7280_c0_seq5	---NA---	9.5132	0.039
comp1129_c0_seq121	---NA---	4.2717	0.0493
comp142_c4_seq19	---NA---	10.696	0.0493

## Sheet: BSA_NP_medium
SeqID_BSA	Seq_Description	BSA_med_logFC	BSA_med_FDR
comp101208_c0_seq1	---NA---	-9.954	0.0443
comp101347_c0_seq1	thns2_xenlathreonine synthase-like 2 os=xenopus laevis gn=thnsl2 pe=2 sv=1	-6.4685	0.0295
comp10193_c0_seq1	---NA---	-12.3568	0.0353
comp1026_c4_seq2	---NA---	4.8258	0.049
comp10276_c0_seq3	sl9a3_ratsodium hydrogen exchanger 3 os=rattus norvegicus gn=slc9a3 pe=1 sv=1	10.2267	0.033
comp10276_c0_seq7	sl9a2_humansodium hydrogen exchanger 2 os=homo sapiens gn=slc9a2 pe=2 sv=1	10.4939	0.0328
comp1030_c0_seq1	---NA---	-9.6856	0.0488
comp103293_c0_seq1	---NA---	-7.9713	0.0441
comp1034_c2_seq1	---NA---	-9.4383	0.0241
comp1038_c0_seq1	---NA---	-10.2278	0.0355
comp1038_c0_seq2	---NA---	-10.106	0.0415
comp104490_c0_seq1	---NA---	-7.7878	0.0364
comp10483_c0_seq1	---NA---	-9.8221	0.033
comp10483_c0_seq2	---NA---	-11.4643	0.027
comp10524_c0_seq3	leg7_humangalectin-7 os=homo sapiens gn=lgals7 pe=1 sv=2	-11.4753	0.0474
comp10524_c0_seq5	rtxe_dromeprobable rna-directed dna polymerase from transposon x-element os=drosophila melanogaster gn=x-element\orf2 pe=3 sv=1	-6.7592	0.0364
comp105463_c0_seq1	---NA---	-7.5074	0.0461
comp106267_c0_seq1	---NA---	-7.5873	0.0485
comp106359_c0_seq1	---NA---	-7.1144	0.0377
comp1072_c0_seq2	protein quiver	7.4365	0.0314
comp1073_c0_seq1	---NA---	-10.5674	0.0372
comp1077_c0_seq1	---NA---	4.8447	0.0045
comp1077_c0_seq2	---NA---	4.3617	0.005
comp1077_c0_seq3	---NA---	4.3622	0.0104
comp10963_c0_seq11	glsk_mouseglutaminase kidney mitochondrial os=mus musculus gn=gls pe=1 sv=1	5.7808	0.005
comp10963_c0_seq19	---NA---	6.5622	0.0063
comp10963_c0_seq2	---NA---	5.5306	0.0039
comp11022_c0_seq2	---NA---	6.0167	0.0204
comp11071_c0_seq1	---NA---	-10.4553	0.0409
comp110843_c0_seq1	---NA---	-6.6276	0.0443
comp11087_c0_seq5	kif11_humankinesin-like protein kif11 os=homo sapiens gn=kif11 pe=1 sv=2	-2.3711	0.047
comp110969_c0_seq1	---NA---	-7.1173	0.0443
comp11137_c0_seq1	---NA---	-12.2395	0.027
comp11282_c0_seq2	---NA---	3.7842	0.0491
comp1129_c0_seq101	---NA---	4.1065	0.031
comp1129_c0_seq108	---NA---	3.8506	0.0147
comp1129_c0_seq117	---NA---	4.1545	0.021
comp1129_c0_seq12	---NA---	5.8914	0.0301
comp1129_c0_seq121	---NA---	5.304	0.0017
comp1129_c0_seq21	---NA---	5.7094	0.005
comp1129_c0_seq45	---NA---	5.6065	0.0295
comp1129_c0_seq61	---NA---	4.1137	0.0467
comp1129_c0_seq64	---NA---	6.0325	0.007
comp1129_c0_seq77	---NA---	5.8937	0.0372
comp1129_c0_seq9	---NA---	7.0976	0.005
comp1132_c5_seq1	---NA---	-11.6472	0.0478
comp11408_c0_seq1	---NA---	-8.8443	0.0354
comp1141_c1_seq1	---NA---	-9.9381	0.0325
comp1142_c0_seq63	sbspo_bovinsomatomedin-b and thrombospondin type-1 domain-containing protein os=bos taurus gn=sbspon pe=2 sv=2	5.8776	0.0281
comp1150_c2_seq1	---NA---	3.03	0.0338
comp115048_c0_seq1	---NA---	-6.9147	0.0474
comp116003_c0_seq1	---NA---	-9.5339	0.0336
comp116286_c0_seq1	---NA---	-10.2172	0.0372
comp116509_c0_seq1	---NA---	-8.7505	0.0349
comp1170_c0_seq1	---NA---	8.0492	0.0104
comp1170_c0_seq2	mt_eisfocadmium-metallothionein os=eisenia foetida gn=mt pe=1 sv=1	5.8289	0.0025
comp11789_c0_seq1	cytochrome-c oxidase activity	-8.0343	0.0424
comp119864_c0_seq1	---NA---	-9.5639	0.0478
comp1207_c0_seq1	nu4m_lumtenadh-ubiquinone oxidoreductase chain 4 os=lumbricus terrestris gn=nd4 pe=3 sv=1	-9.9426	0.0369
comp12174_c0_seq1	---NA---	-9.0888	0.0472
comp12175_c0_seq10	---NA---	-8.0184	0.049
comp12175_c0_seq5	---NA---	-8.3149	0.0441
comp12175_c0_seq8	---NA---	-8.4655	0.0436
comp12217_c0_seq2	znt1_macfazinc transporter 1 os=macaca fascicularis gn=slc30a1 pe=2 sv=1	5.1674	0.0353
comp122806_c0_seq1	---NA---	7.3818	0.0409
comp1233_c0_seq1	nu2m_lumtenadh-ubiquinone oxidoreductase chain 2 os=lumbricus terrestris gn=nd2 pe=3 sv=1	-10.1166	0.0461
comp1234_c1_seq1	---NA---	-8.4184	0.0405
comp1271_c0_seq2	nu5m_lumtenadh-ubiquinone oxidoreductase chain 5 os=lumbricus terrestris gn=nd5 pe=3 sv=1	-10.4351	0.0364
comp1278_c0_seq8	notch_xenlaneurogenic locus notch protein homolog os=xenopus laevis gn=notch1 pe=1 sv=3	-3.9948	0.0491
comp12820_c0_seq1	---NA---	-10.84	0.0372
comp1283_c0_seq1	---NA---	-9.2464	0.0351
comp12895_c0_seq1	---NA---	6.3726	0.0395
comp13076_c0_seq1	---NA---	-8.865	0.0104
comp1313_c1_seq15	---NA---	-5.1885	0.0475
comp1313_c1_seq2	---NA---	-5.2205	0.0472
comp1313_c1_seq3	---NA---	-4.3684	0.049
comp1313_c1_seq7	---NA---	-4.9094	0.0488
comp13184_c0_seq1	uncharacterized protein LOC110068750	-8.5705	0.0257
comp13184_c0_seq2	---NA---	-9.5248	0.0105
comp13317_c0_seq16	---NA---	5.327	0.0475
comp13317_c0_seq2	---NA---	3.5106	0.0461
comp1333_c0_seq37	---NA---	6.3569	0.0487
comp13339_c0_seq1	---NA---	5.8365	0.0369
comp13428_c0_seq1	---NA---	4.0287	0.031
comp1346_c1_seq26	tsn11_rattetraspanin-11 os=rattus norvegicus gn=tspan11 pe=2 sv=1	-4.7073	0.031
comp1346_c1_seq27	---NA---	-9.6346	0.0355
comp1353_c1_seq263	---NA---	4.4451	0.027
comp1353_c1_seq283	---NA---	4.104	0.0301
comp1353_c1_seq452	hypothetical protein CAPTEDRAFT_105668, partial	3.9185	0.0295
comp1353_c1_seq550	anta_hydvuantistasin os=hydra vulgaris pe=2 sv=1	3.4343	0.0414
comp1353_c1_seq557	anta_hydvuantistasin os=hydra vulgaris pe=2 sv=1	3.599	0.0443
comp1353_c1_seq611	anta_hydvuantistasin os=hydra vulgaris pe=2 sv=1	3.75	0.0323
comp1353_c1_seq670	anta_hydvuantistasin os=hydra vulgaris pe=2 sv=1	3.6574	0.0372
comp1353_c1_seq86	anta_hydvuantistasin os=hydra vulgaris pe=2 sv=1	3.9143	0.0301
comp1382_c0_seq1	nu3m_lumtenadh-ubiquinone oxidoreductase chain 3 os=lumbricus terrestris gn=nd3 pe=3 sv=1	-10.2373	0.0409
comp1387_c1_seq1	---NA---	-7.2232	0.0409
comp13924_c0_seq1	---NA---	-7.5988	0.0483
comp13957_c0_seq1	---NA---	-9.6931	0.0436
comp14008_c0_seq1	---NA---	-9.0294	0.0443
comp1402_c0_seq1	nu4m_lumtenadh-ubiquinone oxidoreductase chain 4 os=lumbricus terrestris gn=nd4 pe=3 sv=1	-10.8054	0.0436
comp1418_c0_seq1	---NA---	-10.3671	0.0366
comp14257_c0_seq1	---NA---	-8.8479	0.0468
comp1449_c0_seq1	---NA---	3.1424	0.0377
comp1481_c1_seq5	---NA---	-9.8003	0.0437
comp1481_c1_seq9	---NA---	-9.2955	0.0445
comp1481_c2_seq1	---NA---	-8.2182	0.0491
comp15009_c1_seq1	---NA---	7.2453	0.0475
comp15077_c0_seq1	---NA---	6.3725	0.0409
comp15077_c0_seq2	---NA---	9.9243	0.0122
comp15128_c1_seq2	---NA---	5.6837	0.0433
comp15183_c0_seq1	pi16_humanpeptidase inhibitor 16 os=homo sapiens gn=pi16 pe=1 sv=1	-8.8132	0.0372
comp15183_c0_seq2	pi16_humanpeptidase inhibitor 16 os=homo sapiens gn=pi16 pe=1 sv=1	-7.2673	0.0369
comp1528_c0_seq1	nu5m_lumtenadh-ubiquinone oxidoreductase chain 5 os=lumbricus terrestris gn=nd5 pe=3 sv=1	-7.1414	0.0474
comp15351_c0_seq1	---NA---	-7.6352	0.0443
comp15822_c0_seq1	---NA---	8.1864	0.0415
comp1587_c0_seq80	---NA---	3.8378	0.0114
comp16071_c0_seq1	---NA---	-9.3924	0.0336
comp16312_c0_seq1	---NA---	-9.8386	0.0349
comp16327_c0_seq1	---NA---	-7.9032	0.049
comp16374_c0_seq5	---NA---	-6.9332	0.0338
comp16457_c0_seq1	---NA---	-10.2055	0.0475
comp1651_c3_seq19	gbrl2_ratgamma-aminobutyric acid receptor-associated 2 os=rattus norvegicus gn=gabarapl2 pe=2 sv=1	2.4804	0.0461
comp1651_c3_seq31	gbrl2_ratgamma-aminobutyric acid receptor-associated 2 os=rattus norvegicus gn=gabarapl2 pe=2 sv=1	2.5836	0.0461
comp1657_c0_seq1	---NA---	4.7194	0.0275
comp1657_c0_seq2	---NA---	4.7133	0.0281
comp16643_c0_seq2	---NA---	8.431	0.0372
comp16676_c0_seq3	ici_lumtechymotrypsin inhibitor os=lumbricus terrestris pe=1 sv=2	-5.6343	0.0445
comp1669_c0_seq2	cdcp2_mousecub domain-containing protein 2 os=mus musculus gn=cdcp2 pe=2 sv=1	5.4645	0.0075
comp1669_c0_seq3	cdcp2_mousecub domain-containing protein 2 os=mus musculus gn=cdcp2 pe=2 sv=1	5.4975	0.0301
comp16781_c0_seq1	---NA---	-8.4158	0.0204
comp1684_c0_seq3	---NA---	-4.1167	0.0194
comp16945_c0_seq5	---NA---	-9.736	0.0373
comp17026_c1_seq1	lica2_haeifprotein lica os=haemophilus influenzae gn=lica pe=3 sv=1	-8.008	0.0445
comp1707_c0_seq6	huth_humanhistidine ammonia-lyase os=homo sapiens gn=hal pe=1 sv=1	4.6785	0.0183
comp1712_c0_seq8	---NA---	-8.2367	0.0372
comp17161_c0_seq3	---NA---	8.404	0.0017
comp17313_c0_seq1	---NA---	-5.2759	0.0369
comp17324_c0_seq1	---NA---	-10.1534	0.0336
comp17324_c0_seq2	---NA---	-8.8588	0.0487
comp17346_c0_seq6	---NA---	-7.6153	0.0355
comp17396_c0_seq1	---NA---	-7.1252	0.0409
comp1781_c0_seq1	anta_hydvuantistasin os=hydra vulgaris pe=2 sv=1	5.7947	0.0474
comp1788_c0_seq1	fstl1_ratfollistatin-related protein 1 os=rattus norvegicus gn=fstl1 pe=1 sv=1	6.9976	0.0295
comp179_c15_seq67	---NA---	3.3407	0.0415
comp17984_c0_seq2	---NA---	-9.3273	0.0467
comp18215_c0_seq1	---NA---	7.2153	0.016
comp18234_c0_seq1	---NA---	-8.4003	0.0368
comp18234_c0_seq2	---NA---	-7.9395	0.0364
comp18236_c0_seq1	---NA---	10.5918	0.0408
comp18532_c0_seq2	mitochondrial os=homo sapiens gn=amt pe=1 sv=1	4.8702	0.0364
comp18608_c0_seq2	---NA---	-8.8486	0.0475
comp1879_c0_seq1	---NA---	-7.564	0.0355
comp18826_c0_seq1	ccnf_xentrcyclin-f os=xenopus tropicalis gn=ccnf pe=2 sv=1	-2.9092	0.0475
comp1883_c0_seq1	---NA---	-8.792	0.0377
comp18964_c0_seq6	---NA---	-8.4616	0.0436
comp19069_c0_seq1	---NA---	10.6313	0.0487
comp19117_c0_seq1	---NA---	3.004	0.0481
comp19435_c0_seq1	---NA---	-4.4566	0.036
comp19435_c0_seq4	uncharacterized protein LOC106152078	-4.5829	0.0379
comp19476_c0_seq1	---NA---	-8.4604	0.0351
comp19501_c0_seq2	zrc1_yeastzinc cadmium resistance protein os=saccharomyces cerevisiae (strain atcc 204508 s288c) gn=zrc1 pe=1 sv=2	6.9282	0.041
comp1960_c1_seq3	---NA---	3.9091	0.0301
comp1960_c1_seq7	---NA---	3.8392	0.027
comp1960_c4_seq18	---NA---	5.0194	0.0483
comp1960_c4_seq22	---NA---	4.6647	0.0378
comp1960_c4_seq3	---NA---	4.8959	0.049
comp19661_c0_seq1	hunb_cloalprotein hunchback os=clogmia albipunctata gn=hb pe=2 sv=1	3.9825	0.031
comp1976_c0_seq2	---NA---	6.6223	0.0372
comp19789_c0_seq3	---NA---	-9.1266	0.0411
comp198_c0_seq2	cox3_lumtecytochrome c oxidase subunit 3 os=lumbricus terrestris gn=coiii pe=3 sv=1	-10.223	0.0305
comp1987_c0_seq1	---NA---	4.0304	0.0468
comp20042_c0_seq2	---NA---	-5.7968	0.0392
comp2009_c0_seq2	---NA---	-10.0063	0.0323
comp2009_c0_seq5	---NA---	-9.0324	0.0364
comp20237_c0_seq1	---NA---	-10.2358	0.0361
comp2032_c0_seq1	Transmembrane protease serine 7	-8.5793	0.0027
comp20543_c0_seq3	---NA---	-6.3294	0.0453
comp20649_c0_seq1	---NA---	-9.6094	0.0443
comp20745_c0_seq3	---NA---	-7.0314	0.0364
comp20745_c0_seq6	---NA---	-6.7858	0.0353
comp21006_c0_seq11	---NA---	-6.5412	0.0445
comp21006_c0_seq3	---NA---	-6.7615	0.0377
comp21006_c0_seq4	---NA---	-6.8191	0.0373
comp21059_c0_seq3	---NA---	-7.2506	0.0468
comp21059_c0_seq4	---NA---	-7.7171	0.0445
comp21112_c0_seq2	---NA---	-9.0645	0.031
comp21292_c0_seq1	zar1_danrezygote arrest protein 1 os=danio rerio gn=zar1 pe=2 sv=1	-7.7775	0.0364
comp21359_c0_seq1	hypothetical protein CRN43_03535, partial	-6.9313	0.0413
comp21574_c0_seq1	---NA---	-7.7445	0.0433
comp21648_c0_seq1	---NA---	-8.9361	0.0487
comp21773_c0_seq2	---NA---	-8.3854	0.0488
comp21892_c1_seq33	NYN domain-containing protein	-8.6866	0.042
comp2194_c6_seq5	uncharacterized protein LOC111107908	-5.5668	0.037
comp2194_c6_seq67	hypothetical protein Y032_0097g3004	-6.0354	0.0389
comp2220_c1_seq1	---NA---	-7.6537	0.0437
comp22215_c0_seq2	fgl1_bovinfibrinogen-like protein 1 os=bos taurus gn=fgl1 pe=2 sv=1	-7.0895	0.0373
comp22301_c0_seq1	kapca_shee -dependent protein kinase catalytic subunit alpha os=ovis aries gn=prkaca pe=1 sv=3	3.9689	0.0464
comp2240_c0_seq1	agrin_ratagrin os=rattus norvegicus gn=agrn pe=1 sv=2	9.8871	0.0017
comp22465_c0_seq1	---NA---	-8.008	0.0415
comp22476_c0_seq1	---NA---	8.2409	0.0409
comp22476_c0_seq3	---NA---	7.9216	0.0467
comp22505_c0_seq1	---NA---	-6.1395	0.0379
comp22640_c0_seq1	m3k9_mousemitogen-activated protein kinase kinase kinase 9 os=mus musculus gn=map3k9 pe=2 sv=2	8.3824	0.0372
comp22655_c0_seq1	---NA---	6.8335	0.0364
comp2292_c3_seq148	---NA---	8.6958	0.0461
comp2297_c0_seq1	---NA---	-8.6724	0.0461
comp2301_c0_seq5	cas4_ephmushort-chain collagen c4 os=ephydatia muelleri pe=2 sv=1	4.3547	0.033
comp23042_c0_seq1	---NA---	-11.6005	0.0355
comp232_c0_seq1	cox2_lumtecytochrome c oxidase subunit 2 os=lumbricus terrestris gn=coii pe=3 sv=1	-10.3851	0.027
comp2320_c0_seq13	---NA---	-8.9221	0.0409
comp2320_c0_seq3	---NA---	-11.1039	0.0323
comp2320_c0_seq4	---NA---	-9.9202	0.0336
comp23342_c0_seq6	fibc_lumrufibrinolytic isozyme c os=lumbricus rubellus pe=1 sv=1	-11.6112	0.0366
comp2355_c2_seq70	cubn_ratcubilin os=rattus norvegicus gn=cubn pe=1 sv=2	-3.8202	0.0469
comp237_c2_seq4	vpp1_xentrv-type proton atpase 116 kda subunit a isoform 1 os=xenopus tropicalis gn=atp6v0a1 pe=2 sv=1	5.1804	0.0298
comp237_c2_seq5	vpp1_xenlav-type proton atpase 116 kda subunit a isoform 1 os=xenopus laevis gn=atp6v0a1 pe=2 sv=1	7.1242	0.0415
comp237_c2_seq9	vpp1_xenlav-type proton atpase 116 kda subunit a isoform 1 os=xenopus laevis gn=atp6v0a1 pe=2 sv=1	3.9782	0.0443
comp23700_c0_seq1	---NA---	7.4399	0.0443
comp23788_c0_seq1	---NA---	-7.9474	0.0355
comp23788_c0_seq3	---NA---	-8.3448	0.0408
comp23825_c0_seq1	---NA---	-10.1903	0.0378
comp23825_c0_seq4	---NA---	-10.1943	0.0372
comp2399_c0_seq1	---NA---	-11.5922	0.027
comp24382_c0_seq1	---NA---	-7.7349	0.0364
comp245_c4_seq29	---NA---	6.9196	0.0475
comp24941_c0_seq1	---NA---	3.6339	0.0339
comp2532_c0_seq1	---NA---	-11.939	0.0323
comp2537_c0_seq1	hypothetical protein IscW_ISCW013786	-9.5782	0.0372
comp2537_c0_seq11	glra1_danreglycine receptor subunit alphaz1 os=danio rerio gn=glra1 pe=2 sv=1	-2.932	0.0452
comp25395_c0_seq1	---NA---	-7.6801	0.0372
comp25711_c0_seq2	---NA---	9.5988	0.0223
comp2576_c0_seq1	---NA---	-9.9168	0.0373
comp25984_c0_seq1	---NA---	-7.2863	0.0415
comp2609_c0_seq1	---NA---	-8.5888	0.0364
comp2610_c0_seq208	---NA---	8.4223	0.0433
comp2610_c0_seq209	---NA---	8.8452	0.0347
comp26227_c0_seq1	---NA---	-9.8734	0.0378
comp26227_c0_seq2	---NA---	-9.8162	0.0369
comp2626_c1_seq143	---NA---	7.695	0.0039
comp2626_c1_seq161	---NA---	7.3749	0.0443
comp2626_c1_seq243	---NA---	8.1903	0.0067
comp2626_c1_seq253	---NA---	7.3388	0.005
comp2626_c1_seq83	---NA---	2.4628	0.049
comp263_c0_seq2	predicted protein	-5.3264	0.0415
comp2645_c0_seq1	scp_pervtsarcoplasmic calcium-binding protein os=perinereis vancaurica tetradentata pe=1 sv=1	-8.088	0.0409
comp2651_c0_seq9	---NA---	3.202	0.0468
comp266_c1_seq2	---NA---	-7.9783	0.0389
comp26794_c0_seq1	---NA---	-8.5387	0.0443
comp26834_c0_seq3	hypothetical protein CAPTEDRAFT_227009	5.308	0.0122
comp26919_c0_seq2	---NA---	-7.015	0.0496
comp2726_c5_seq66	po21_nasviretrovirus-related pol polyprotein from type-1 retrotransposable element r2 os=nasonia vitripennis pe=4 sv=2	-4.4673	0.0461
comp2726_c6_seq102	---NA---	5.5304	0.0436
comp27381_c0_seq3	---NA---	-8.9369	0.0372
comp27399_c0_seq1	glra4_humanglycine receptor subunit alpha-4 os=homo sapiens gn=glra4 pe=2 sv=3	-3.5326	0.0483
comp275_c0_seq1	cox1_lumtecytochrome c oxidase subunit 1 os=lumbricus terrestris gn=coi pe=3 sv=1	-10.5888	0.033
comp27814_c0_seq1	---NA---	8.729	0.0405
comp28049_c0_seq2	---NA---	-8.3443	0.0364
comp28162_c0_seq1	gcnt7_humanbeta- -galactosyl-o-glycosyl-glycoprotein beta- -n-acetylglucosaminyltransferase 7 os=homo sapiens gn=gcnt7 pe=2 sv=2	-2.8296	0.0436
comp28278_c0_seq1	---NA---	-7.6354	0.0461
comp2830_c3_seq48	tl5b_tactrtechylectin-5b os=tachypleus tridentatus pe=1 sv=1	-6.9047	0.0001
comp28466_c0_seq1	---NA---	-7.0225	0.0364
comp28489_c0_seq1	---NA---	-8.2489	0.0372
comp285_c0_seq1	---NA---	-4.3255	0.0364
comp285_c0_seq3	---NA---	-4.3041	0.0372
comp2856_c0_seq1	ilva_laclal-threonine dehydratase biosynthetic os=lactococcus lactis lactis (strain il1403) gn=ilva pe=3 sv=3	12.4515	0.0185
comp28604_c0_seq1	---NA---	-7.5281	0.0483
comp28630_c0_seq2	---NA---	-8.61	0.0494
comp28842_c0_seq3	---NA---	-9.5994	0.033
comp2898_c0_seq2	---NA---	4.9929	0.0202
comp290_c0_seq1	hypothetical protein ANCCEY_05361	-10.1547	0.0405
comp29296_c0_seq1	---NA---	-8.3155	0.0445
comp29626_c0_seq9	calcium ion binding	-10.9122	0.0114
comp29675_c0_seq2	---NA---	-7.948	0.0372
comp299_c0_seq2	cox1_lumtecytochrome c oxidase subunit 1 os=lumbricus terrestris gn=coi pe=3 sv=1	-10.1159	0.0372
comp299_c0_seq3	cox1_lumtecytochrome c oxidase subunit 1 os=lumbricus terrestris gn=coi pe=3 sv=1	-10.4173	0.0351
comp29910_c0_seq1	---NA---	-8.2694	0.0487
comp30198_c0_seq1	ici_lumtechymotrypsin inhibitor os=lumbricus terrestris pe=1 sv=2	-8.9119	0.0436
comp3020_c1_seq2	---NA---	-9.9769	0.0336
comp30323_c0_seq2	---NA---	-8.2977	0.0411
comp3037_c2_seq2	---NA---	-8.1474	0.0461
comp30406_c0_seq3	---NA---	-8.7867	0.033
comp30679_c0_seq1	jund_rattranscription factor jun-d os=rattus norvegicus gn=jund pe=2 sv=1	4.2893	0.0489
comp30708_c0_seq1	---NA---	7.9549	0.0017
comp30828_c0_seq1	---NA---	4.7404	0.0347
comp30833_c0_seq5	---NA---	-8.0325	0.0374
comp3095_c0_seq2	---NA---	8.4302	0.0017
comp3095_c1_seq1	---NA---	8.6445	0.0363
comp3095_c1_seq2	---NA---	8.4011	0.0017
comp3117_c0_seq5	---NA---	-8.5673	0.0301
comp31637_c0_seq1	---NA---	-8.7156	0.0415
comp31682_c0_seq1	---NA---	-8.986	0.0393
comp31713_c0_seq1	---NA---	-5.5744	0.0323
comp3172_c2_seq26	---NA---	4.7115	0.0409
comp31734_c0_seq1	---NA---	-9.8036	0.0361
comp31802_c0_seq1	lrc4b_humanleucine-rich repeat-containing protein 4b os=homo sapiens gn=lrrc4b pe=1 sv=3	4.3833	0.0487
comp31996_c0_seq1	---NA---	-6.8686	0.027
comp321_c0_seq1	---NA---	-3.393	0.0372
comp321_c0_seq2	---NA---	-3.3515	0.049
comp32181_c0_seq1	---NA---	-10.2954	0.0355
comp3232_c0_seq1	---NA---	8.7395	0.0178
comp32420_c0_seq1	coea1_chickcollagen alpha-1 chain os=gallus gallus gn=col14a1 pe=1 sv=2	-7.8014	0.0323
comp32477_c0_seq1	dscl_dromedown syndrome cell adhesion molecule-like protein dscam2 os=drosophila melanogaster gn=dscam2 pe=2 sv=3	-4.2413	0.0418
comp32477_c0_seq2	RNA-directed DNA polymerase from mobile element jockey-like	-4.2269	0.0433
comp32477_c0_seq3	dscl_dromedown syndrome cell adhesion molecule-like protein dscam2 os=drosophila melanogaster gn=dscam2 pe=2 sv=3	-4.3842	0.0364
comp32477_c0_seq4	RNA-directed DNA polymerase from mobile element jockey-like	-4.362	0.0366
comp3254_c0_seq3	fstl5_mousefollistatin-related protein 5 os=mus musculus gn=fstl5 pe=2 sv=1	5.5941	0.02
comp32713_c0_seq1	---NA---	-7.1451	0.0461
comp328_c7_seq12	---NA---	7.7529	0.0378
comp328_c7_seq2	---NA---	7.3137	0.0131
comp328_c7_seq7	---NA---	7.3176	0.0131
comp328_c7_seq8	---NA---	7.7545	0.0378
comp32879_c0_seq1	angl1_humanangiopoietin-related protein 1 os=homo sapiens gn=angptl1 pe=2 sv=1	-7.8705	0.0461
comp32897_c0_seq1	---NA---	-7.8773	0.0487
comp3303_c0_seq1	---NA---	9.5698	0.0129
comp33156_c0_seq1	---NA---	-10.1706	0.0351
comp33156_c0_seq2	---NA---	-9.7117	0.0336
comp3326_c0_seq10	tld_dromedorsal-ventral patterning protein tolloid os=drosophila melanogaster gn=tld pe=2 sv=2	-5.2181	0.031
comp3326_c0_seq4	cdcp2_mousecub domain-containing protein 2 os=mus musculus gn=cdcp2 pe=2 sv=1	-3.8807	0.0491
comp3326_c0_seq8	tll1_humantolloid-like protein 1 os=homo sapiens gn=tll1 pe=1 sv=1	-5.3531	0.028
comp333_c4_seq19	neurm_hirmeneuromacin os=hirudo medicinalis pe=3 sv=1	5.7319	0.0364
comp333_c4_seq7	neurm_hirmeneuromacin os=hirudo medicinalis pe=3 sv=1	4.8208	0.0295
comp333_c7_seq24	lipid binding	5.5092	0.0355
comp3355_c1_seq1	---NA---	8.475	0.0445
comp33603_c0_seq1	---NA---	-8.9452	0.031
comp33702_c0_seq1	---NA---	-6.9599	0.0409
comp3372_c2_seq14	---NA---	-10.074	0.0301
comp3372_c2_seq16	---NA---	-9.2863	0.0409
comp33721_c0_seq1	---NA---	-9.8527	0.0323
comp33931_c0_seq1	---NA---	6.9123	0.0464
comp34024_c0_seq2	---NA---	-8.1002	0.0475
comp34176_c0_seq1	---NA---	-9.1471	0.04
comp34210_c0_seq1	---NA---	-8.6524	0.0366
comp34347_c0_seq1	sterile alpha motif domain-containing protein 3-like	-4.2316	0.0478
comp34463_c0_seq10	---NA---	-6.2306	0.0281
comp3489_c0_seq1	c2512_danrecholesterol 25-hydroxylase-like protein member 2 os=danio rerio gn= pe=3 sv=1	7.2943	0.0262
comp3490_c0_seq1	---NA---	11.2449	0.005
comp3490_c0_seq3	---NA---	11.4507	0.0046
comp3490_c0_seq4	---NA---	6.6821	0.0323
comp3490_c0_seq6	---NA---	12.1115	0.0123
comp3509_c1_seq13	cp2e1_mesaucytochrome p450 2e1 os=mesocricetus auratus gn=cyp2e1 pe=2 sv=1	-3.0472	0.0415
comp3509_c1_seq7	iron ion binding;oxidoreductase activity, acting on paired donors, with incorporation or reduction of molecular oxygen;heme binding;oxidation-reduction process	-2.9085	0.0372
comp35172_c0_seq1	---NA---	-9.3686	0.033
comp35505_c0_seq1	---NA---	-7.022	0.0281
comp35805_c0_seq1	---NA---	-7.6157	0.0314
comp35835_c0_seq1	ubip1_humanupstream-binding protein 1 os=homo sapiens gn=ubp1 pe=2 sv=1	7.328	0.0475
comp3607_c0_seq1	protein binding	8.4499	0.0411
comp36229_c0_seq2	---NA---	-11.7698	0.027
comp36314_c0_seq2	urom_bovinuromodulin os=bos taurus gn=umod pe=2 sv=1	-3.3105	0.0461
comp36402_c1_seq2	---NA---	-7.4106	0.0467
comp36687_c0_seq1	---NA---	3.0667	0.0483
comp3671_c0_seq1	---NA---	-8.7518	0.049
comp36770_c0_seq1	---NA---	-7.5888	0.0281
comp36894_c0_seq1	---NA---	-7.9096	0.0372
comp36909_c0_seq2	---NA---	-7.9264	0.0489
comp370_c0_seq1	catl1_humancathepsin l1 os=homo sapiens gn=ctsl1 pe=1 sv=2	-9.3955	0.0372
comp3706_c0_seq1	fibc_lumrufibrinolytic isozyme c os=lumbricus rubellus pe=1 sv=1	-10.3228	0.0281
comp37529_c0_seq2	low affinity immunoglobulin epsilon Fc receptor	-7.7847	0.0237
comp37723_c0_seq1	---NA---	-7.3055	0.0389
comp37742_c0_seq1	---NA---	-8.7443	0.0405
comp3817_c0_seq1	---NA---	8.9452	0.0305
comp3852_c5_seq65	ptn12_humantyrosine-protein phosphatase non-receptor type 12 os=homo sapiens gn=ptpn12 pe=1 sv=3	-2.0599	0.0486
comp3874_c0_seq2	---NA---	-10.0558	0.0301
comp38924_c0_seq2	---NA---	-8.6003	0.0461
comp38971_c0_seq1	---NA---	-7.6741	0.0352
comp39147_c0_seq1	---NA---	-6.9605	0.0443
comp39201_c0_seq2	---NA---	7.2783	0.0441
comp39410_c0_seq1	---NA---	-6.4553	0.0484
comp395_c3_seq1	---NA---	9.4533	0.0301
comp39532_c0_seq1	---NA---	-7.6809	0.036
comp39553_c0_seq1	---NA---	-7.9413	0.0474
comp39610_c0_seq7	---NA---	-7.7005	0.0445
comp39795_c0_seq1	---NA---	-10.0526	0.04
comp39953_c0_seq2	---NA---	-7.7536	0.0469
comp40218_c0_seq1	prc1_mouseprotein regulator of cytokinesis 1 os=mus musculus gn=prc1 pe=2 sv=2	-3.2749	0.0415
comp40226_c0_seq1	---NA---	-6.9186	0.0475
comp40307_c0_seq1	---NA---	9.1798	0.0409
comp40307_c0_seq2	---NA---	8.7621	0.0445
comp40315_c0_seq1	---NA---	-7.1466	0.0386
comp40469_c0_seq1	calcium ion binding	-12.6564	0.033
comp40554_c0_seq1	---NA---	-9.6175	0.033
comp40683_c0_seq1	---NA---	-10.1291	0.0455
comp4081_c0_seq5	e74eb_dromeecdysone-induced protein 74ef isoform b os=drosophila melanogaster gn=eip74ef pe=2 sv=2	2.784	0.0301
comp40923_c0_seq1	---NA---	-9.9458	0.0373
comp40926_c0_seq1	SCBP2-like protein	-9.9556	0.031
comp41046_c0_seq1	---NA---	-7.5354	0.0167
comp41209_c0_seq1	---NA---	-12.073	0.031
comp41221_c0_seq2	---NA---	-8.9489	0.045
comp41232_c0_seq2	---NA---	-8.0789	0.0474
comp41331_c0_seq1	---NA---	-8.4623	0.0474
comp41347_c0_seq2	anln_xenlaactin-binding protein anillin os=xenopus laevis gn=anln pe=1 sv=1	-2.9418	0.0364
comp4147_c0_seq1	adh_sulacnad-dependent alcohol dehydrogenase os=sulfolobus acidocaldarius (strain atcc 33909 dsm 639 jcm 8929 nbrc 15157 ncimb 11770) gn=adh pe=3 sv=1	-8.0784	0.0351
comp41594_c0_seq1	---NA---	-9.0901	0.0364
comp4160_c0_seq1	---NA---	10.0713	0.0364
comp41702_c0_seq2	---NA---	-8.2736	0.0364
comp41904_c0_seq2	---NA---	-8.7377	0.0468
comp41904_c0_seq4	---NA---	-9.4364	0.0131
comp42065_c0_seq1	---NA---	4.3919	0.0372
comp42080_c0_seq1	---NA---	-9.4161	0.0436
comp42184_c0_seq1	---NA---	-7.6451	0.0477
comp42676_c0_seq1	---NA---	-8.0653	0.0469
comp42895_c0_seq1	---NA---	-9.0337	0.0336
comp43173_c0_seq1	---NA---	-8.373	0.0489
comp43173_c0_seq3	---NA---	-8.2427	0.0409
comp43201_c0_seq1	---NA---	-7.3325	0.0417
comp43384_c0_seq1	---NA---	-8.5464	0.0443
comp43536_c0_seq1	---NA---	-8.1847	0.0308
comp4366_c1_seq1	---NA---	2.803	0.0467
comp43940_c0_seq1	---NA---	-8.9405	0.0445
comp4439_c0_seq1	uncharacterized protein LOC110232929	-9.2709	0.0363
comp4472_c0_seq1	---NA---	4.6928	0.0467
comp448_c5_seq1	---NA---	5.8583	0.0405
comp448_c5_seq11	---NA---	3.6358	0.027
comp448_c5_seq62	---NA---	4.8366	0.033
comp448_c5_seq96	---NA---	5.9732	0.0328
comp44889_c0_seq2	LBP/BPI Lipopolysacharide binding protein-permeability increasing protein	-8.0306	0.0077
comp44889_c0_seq3	bpi_ratbactericidal permeability-increasing protein os=rattus norvegicus gn=bpi pe=2 sv=1	-7.6841	0.0067
comp44942_c0_seq1	---NA---	-6.739	0.036
comp4507_c0_seq1	---NA---	-8.5999	0.045
comp45116_c0_seq1	frrs1_xenla ferric-chelate reductase 1 os=xenopus laevis gn=frrs1 pe=2 sv=1	7.1814	0.031
comp45116_c0_seq3	frrs1_xenla ferric-chelate reductase 1 os=xenopus laevis gn=frrs1 pe=2 sv=1	9.0177	0.0295
comp45128_c0_seq2	---NA---	-7.321	0.0411
comp45248_c0_seq1	---NA---	-8.334	0.0467
comp4527_c1_seq17	s20a1_xentrsodium-dependent phosphate transporter 1 os=xenopus tropicalis gn=slc20a1 pe=2 sv=1	3.9695	0.0443
comp4546_c0_seq2	---NA---	6.1157	0.0079
comp45516_c0_seq1	---NA---	-8.2185	0.049
comp45653_c0_seq2	---NA---	-7.5931	0.0356
comp45767_c0_seq1	---NA---	-9.1873	0.0281
comp45931_c0_seq1	---NA---	-8.2041	0.0295
comp45945_c0_seq1	---NA---	-7.0576	0.0364
comp45945_c0_seq2	---NA---	-7.3191	0.0415
comp46043_c0_seq1	---NA---	-8.1529	0.0355
comp46072_c0_seq1	---NA---	-6.9919	0.0389
comp4626_c1_seq105	rdh16_humanretinol dehydrogenase 16 os=homo sapiens gn=rdh16 pe=1 sv=2	-6.945	0.0489
comp46262_c0_seq2	hypothetical protein Y032_0012g1845	-8.811	0.0348
comp46262_c0_seq3	---NA---	-8.9761	0.0428
comp46262_c0_seq8	---NA---	-8.7859	0.0377
comp46381_c0_seq1	---NA---	-7.5841	0.049
comp4643_c0_seq1	integral component of membrane	5.4687	0.0394
comp4643_c0_seq16	tetraspanin, partial	4.5815	0.0483
comp4643_c0_seq24	tetraspanin, partial	4.7003	0.0441
comp4643_c0_seq28	integral component of membrane	5.4444	0.0411
comp4643_c0_seq29	integral component of membrane	5.2487	0.0475
comp4643_c0_seq35	tetraspanin, partial	4.8831	0.0428
comp4643_c0_seq43	integral component of membrane	5.4043	0.0445
comp4643_c0_seq5	integral component of membrane	5.5381	0.0389
comp46439_c0_seq1	calcium ion binding	-10.6807	0.0428
comp46482_c0_seq2	---NA---	-9.1239	0.0364
comp46545_c0_seq5	---NA---	-9.1466	0.0211
comp46650_c0_seq1	---NA---	-7.8668	0.0295
comp4676_c0_seq1	---NA---	7.2029	0.031
comp470_c0_seq1	atp6_lumteatp synthase subunit a os=lumbricus terrestris gn=atp6 pe=3 sv=1	-10.5515	0.0314
comp47310_c0_seq1	---NA---	-7.7173	0.0409
comp47320_c0_seq1	tri56_bovine3 ubiquitin-protein ligase trim56 os=bos taurus gn=trim56 pe=3 sv=1	-7.7637	0.0301
comp47623_c0_seq2	---NA---	-8.3335	0.0467
comp47657_c0_seq1	---NA---	-8.9845	0.0475
comp47669_c1_seq1	---NA---	-9.7898	0.0354
comp47796_c0_seq1	mfap4_humanmicrofibril-associated glycoprotein 4 os=homo sapiens gn=mfap4 pe=1 sv=2	-11.0033	0.0475
comp48112_c0_seq1	---NA---	-7.7537	0.0437
comp48254_c0_seq1	scp_pervtsarcoplasmic calcium-binding protein os=perinereis vancaurica tetradentata pe=1 sv=1	-9.5991	0.0281
comp48915_c0_seq1	---NA---	-8.0157	0.0443
comp49294_c0_seq1	---NA---	-8.5718	0.0467
comp49392_c0_seq2	---NA---	-7.9105	0.0485
comp49392_c0_seq3	---NA---	-8.0012	0.0475
comp49508_c0_seq1	---NA---	-8.5489	0.0409
comp4954_c0_seq7	uncharacterized protein LOC106176639	-7.1159	0.0046
comp49726_c0_seq1	---NA---	-8.1655	0.0323
comp49838_c0_seq1	---NA---	-7.4179	0.036
comp50533_c0_seq1	---NA---	-6.265	0.0443
comp50812_c0_seq1	---NA---	-6.0183	0.0131
comp50842_c0_seq1	---NA---	-9.4715	0.0348
comp51_c1_seq1	---NA---	8.1513	0.036
comp51_c1_seq5	---NA---	8.1447	0.036
comp51_c1_seq6	---NA---	6.6634	0.0464
comp512_c0_seq1	---NA---	-10.9281	0.0217
comp512_c0_seq3	---NA---	-10.0893	0.031
comp51249_c0_seq1	---NA---	-8.7783	0.0415
comp5132_c0_seq23	frrs1_xenla ferric-chelate reductase 1 os=xenopus laevis gn=frrs1 pe=2 sv=1	2.3395	0.049
comp51321_c0_seq1	---NA---	-5.7606	0.0468
comp5134_c1_seq2	mitochondrion;ATPase inhibitor activity;negative regulation of ATPase activity	8.3313	0.0178
comp5134_c1_seq4	mitochondrion;ATPase inhibitor activity;negative regulation of ATPase activity	7.9356	0.0355
comp5142_c0_seq2	---NA---	-8.5963	0.0445
comp51594_c0_seq1	---NA---	-7.4113	0.0475
comp51825_c0_seq1	---NA---	-8.5141	0.0363
comp52523_c0_seq1	---NA---	-8.4457	0.0445
comp5274_c0_seq1	grn_humangranulins os=homo sapiens gn=grn pe=1 sv=2	-9.2232	0.033
comp5278_c0_seq2	CDP-diacylglycerol---serine O-phosphatidyltransferase	3.9911	0.0481
comp529_c2_seq13	agrin_mouseagrin os=mus musculus gn=agrn pe=1 sv=1	6.3185	0.004
comp529_c2_seq14	agrin_ratagrin os=rattus norvegicus gn=agrn pe=1 sv=2	5.9109	0.005
comp529_c2_seq28	agrin_humanagrin os=homo sapiens gn=agrn pe=1 sv=4	6.0394	0.004
comp529_c2_seq4	---NA---	7.7876	0.0347
comp53_c0_seq5	pa2g3_bovingroup 3 secretory phospholipase a2 os=bos taurus gn=pla2g3 pe=2 sv=1	-7.4636	0.0295
comp530_c0_seq14	lin1_nyccoline-1 reverse transcriptase homolog os=nycticebus coucang pe=1 sv=1	-5.4257	0.0372
comp53095_c0_seq1	---NA---	-9.4077	0.049
comp53351_c0_seq4	---NA---	-8.1901	0.0325
comp53351_c0_seq7	---NA---	-7.4413	0.0372
comp53366_c0_seq2	---NA---	-7.1975	0.0475
comp535_c0_seq1	cyb_lumtecytochrome b os=lumbricus terrestris gn=mt-cyb pe=3 sv=1	-10.5467	0.0314
comp53523_c0_seq1	---NA---	-7.6251	0.0373
comp5365_c0_seq7	---NA---	3.3462	0.0262
comp53832_c0_seq1	---NA---	-9.4192	0.0323
comp53950_c0_seq1	---NA---	-7.9027	0.049
comp54_c0_seq1	anta_hydvuantistasin os=hydra vulgaris pe=2 sv=1	3.5179	0.049
comp54300_c0_seq1	---NA---	-10.0514	0.0364
comp548_c4_seq9	---NA---	-5.4072	0.0308
comp54918_c0_seq1	---NA---	-10.2334	0.0364
comp5535_c0_seq5	vas1_humanv-type proton atpase subunit s1 os=homo sapiens gn=atp6ap1 pe=1 sv=2	4.6176	0.0443
comp55503_c0_seq1	placenta-specific gene 8 protein-like	-9.77	0.0364
comp5554_c2_seq28	---NA---	4.4519	0.0295
comp55576_c0_seq3	---NA---	-6.9644	0.0468
comp5560_c0_seq1	---NA---	6.3382	0.0481
comp56036_c0_seq1	chondroitin proteoglycan 2-like	-7.0966	0.0472
comp56250_c0_seq1	---NA---	-7.5474	0.0461
comp5672_c0_seq1	---NA---	6.5521	0.0361
comp56894_c0_seq1	---NA---	-9.4434	0.0464
comp5723_c0_seq3	mot14_humanmonocarboxylate transporter 14 os=homo sapiens gn=slc16a14 pe=2 sv=1	3.3775	0.0372
comp57311_c0_seq1	---NA---	-7.2224	0.0475
comp5745_c0_seq1	---NA---	7.6352	0.0488
comp576_c2_seq2	---NA---	5.2466	0.0298
comp576_c2_seq6	assy_xentrargininosuccinate synthase os=xenopus tropicalis gn=ass1 pe=2 sv=1	4.8505	0.0165
comp57637_c0_seq2	---NA---	-8.5063	0.033
comp57672_c0_seq1	---NA---	-10.5304	0.0328
comp57681_c0_seq1	---NA---	-7.4566	0.049
comp57902_c0_seq1	---NA---	-6.4806	0.0461
comp58089_c0_seq2	---NA---	-8.4719	0.0372
comp5822_c0_seq1	---NA---	-9.3191	0.0443
comp5844_c2_seq1	sc5a6_drome sodium-dependent multivitamin transporter os=drosophila melanogaster gn=cg32669 pe=2 sv=1	3.3158	0.0467
comp5844_c2_seq30	sc5a6_drome sodium-dependent multivitamin transporter os=drosophila melanogaster gn=cg32669 pe=2 sv=1	3.2489	0.0474
comp58472_c0_seq1	---NA---	-8.4456	0.0497
comp5851_c0_seq7	---NA---	5.1246	0.0075
comp5859_c0_seq1	s17a5_humansialin os=homo sapiens gn=slc17a5 pe=1 sv=2	4.2412	0.0355
comp5961_c0_seq1	fstl5_mousefollistatin-related protein 5 os=mus musculus gn=fstl5 pe=2 sv=1	9.8141	0.0039
comp5961_c0_seq2	agrin_ratagrin os=rattus norvegicus gn=agrn pe=1 sv=2	9.8206	0.004
comp59673_c0_seq1	---NA---	-8.3321	0.036
comp59908_c0_seq1	---NA---	-8.5079	0.0372
comp6003_c0_seq2	s2611_humansodium-independent sulfate anion transporter os=homo sapiens gn=slc26a11 pe=1 sv=2	9.1107	0.0336
comp607_c1_seq4	fbcdb_xenlafibrinogen c domain-containing protein 1-b os=xenopus laevis gn=fibcd1-b pe=2 sv=1	3.2643	0.031
comp6076_c0_seq1	---NA---	-8.8721	0.0491
comp60982_c0_seq1	---NA---	-10.4825	0.0323
comp61268_c0_seq1	---NA---	-7.7093	0.0445
comp6158_c0_seq1	---NA---	-10.0729	0.027
comp6162_c0_seq1	---NA---	7.892	0.0323
comp62095_c0_seq2	---NA---	-9.564	0.0489
comp621_c1_seq10	---NA---	-6.8356	0.0461
comp6219_c0_seq1	---NA---	4.6855	0.0323
comp6220_c1_seq1	cdcp2_mousecub domain-containing protein 2 os=mus musculus gn=cdcp2 pe=2 sv=1	4.9193	0.0301
comp62356_c0_seq1	---NA---	-5.0064	0.049
comp6238_c1_seq1	---NA---	-8.6518	0.0389
comp62536_c0_seq2	---NA---	-8.3074	0.0364
comp62760_c0_seq1	---NA---	-7.4385	0.0301
comp6281_c2_seq1	---NA---	-8.007	0.0328
comp6281_c2_seq2	---NA---	-8.4651	0.031
comp62926_c0_seq1	sodf_metjsuperoxide dismutase	-6.5234	0.0378
comp62990_c0_seq1	---NA---	-7.71	0.0468
comp63602_c0_seq1	---NA---	-7.8458	0.0409
comp6365_c0_seq9	---NA---	10.2712	0.0389
comp63916_c0_seq1	---NA---	-6.3767	0.0394
comp640_c1_seq1	---NA---	-7.9564	0.0461
comp64180_c0_seq1	PREDICTED: uncharacterized protein LOC108360842	-7.9392	0.0462
comp64342_c0_seq1	---NA---	-7.455	0.0487
comp6453_c0_seq2	lipid binding	-9.0736	0.0039
comp64587_c0_seq1	---NA---	-13.1436	0.0364
comp653_c0_seq1	nu1m_lumtenadh-ubiquinone oxidoreductase chain 1 os=lumbricus terrestris gn=nd1 pe=3 sv=1	-10.4516	0.0323
comp656_c2_seq18	---NA---	-9.6726	0.0372
comp656_c2_seq2	---NA---	-9.5019	0.0308
comp656_c2_seq8	---NA---	-9.3866	0.0272
comp656_c2_seq9	---NA---	-9.4638	0.0364
comp6575_c0_seq1	cubn_ratcubilin os=rattus norvegicus gn=cubn pe=1 sv=2	-8.5591	0.0301
comp6575_c0_seq2	cubn_mousecubilin os=mus musculus gn=cubn pe=1 sv=3	-8.871	0.027
comp6575_c0_seq3	---NA---	-8.3343	0.0323
comp65861_c0_seq1	---NA---	-4.345	0.0262
comp66371_c0_seq1	---NA---	-8.623	0.0348
comp66486_c0_seq1	---NA---	-8.5641	0.0464
comp66571_c0_seq2	---NA---	-8.7402	0.0301
comp66591_c0_seq1	---NA---	-6.377	0.0409
comp66791_c0_seq1	---NA---	-7.2358	0.0487
comp67037_c0_seq1	---NA---	-8.8708	0.0355
comp67037_c0_seq2	---NA---	-8.5879	0.0351
comp67375_c0_seq1	---NA---	-6.757	0.0364
comp67538_c0_seq1	PREDICTED: uncharacterized protein LOC105316215	-8.079	0.041
comp6776_c0_seq2	---NA---	5.4417	0.0372
comp67785_c0_seq1	coca1_humancollagen alpha-1 chain os=homo sapiens gn=col12a1 pe=1 sv=2	-7.651	0.036
comp68104_c0_seq1	---NA---	-9.9297	0.0298
comp68183_c0_seq1	---NA---	-8.7331	0.0364
comp6819_c1_seq1	---NA---	-8.8915	0.0441
comp6819_c1_seq4	---NA---	-9.9659	0.033
comp6875_c0_seq1	---NA---	-9.6771	0.0355
comp6875_c0_seq2	---NA---	-10.8876	0.027
comp69011_c0_seq1	---NA---	-9.6064	0.0364
comp69068_c0_seq1	---NA---	-9.69	0.0364
comp6982_c0_seq8	---NA---	5.2248	0.036
comp6982_c0_seq9	---NA---	4.9024	0.033
comp69847_c0_seq2	SCBP2-like protein	-8.2966	0.0372
comp6987_c0_seq1	iod3_xenlatype iii iodothyronine deiodinase os=xenopus laevis gn=dio3 pe=1 sv=2	4.8729	0.0445
comp700_c0_seq1	---NA---	-10.3702	0.0376
comp703_c8_seq639	---NA---	7.2016	0.0367
comp70820_c0_seq1	---NA---	-9.1522	0.033
comp7101_c0_seq1	pored_xenlaprobable polyprenol reductase os=xenopus laevis gn=srd5a3 pe=2 sv=1	-2.6922	0.0441
comp71242_c0_seq1	---NA---	-9.8765	0.0425
comp717_c0_seq1	grn_ratgranulins os=rattus norvegicus gn=grn pe=1 sv=3	-6.3785	0.049
comp7177_c0_seq2	---NA---	-10.0751	0.0372
comp71928_c0_seq4	---NA---	-7.9939	0.045
comp727_c1_seq1	---NA---	3.6144	0.0411
comp7280_c0_seq5	---NA---	7.4221	0.0372
comp72815_c0_seq2	---NA---	-8.3847	0.036
comp72937_c0_seq1	---NA---	-8.1984	0.0355
comp7324_c0_seq1	---NA---	-9.2259	0.0301
comp7327_c0_seq10	---NA---	-7.6087	0.0452
comp7327_c0_seq12	---NA---	-8.7084	0.0461
comp7327_c0_seq6	---NA---	-9.4751	0.0445
comp7327_c0_seq7	---NA---	-9.2909	0.0436
comp7327_c0_seq8	---NA---	-8.9548	0.0461
comp739_c8_seq205	---NA---	-10.2082	0.0364
comp74247_c0_seq1	---NA---	-8.0375	0.0465
comp7437_c0_seq8	---NA---	-7.4562	0.0351
comp74390_c0_seq1	---NA---	-7.6823	0.0486
comp74468_c0_seq1	---NA---	-8.0925	0.0491
comp7466_c0_seq1	---NA---	10.5716	0.0411
comp7502_c1_seq5	fbp3_strpufibropellin-3 os=strongylocentrotus purpuratus gn=egf3 pe=1 sv=1	-5.6141	0.048
comp7502_c1_seq6	cspg2_mouseversican core protein os=mus musculus gn=vcan pe=1 sv=2	-6.9256	0.0257
comp751_c3_seq3	lys2_cravilysozyme 2 os=crassostrea virginica gn=lysoz2 pe=1 sv=1	5.7081	0.031
comp7542_c0_seq1	---NA---	3.024	0.0444
comp76141_c0_seq1	---NA---	-7.2206	0.0443
comp768_c0_seq2	---NA---	8.3874	0.0372
comp77580_c0_seq1	---NA---	-8.0001	0.0366
comp7987_c1_seq13	s15a1_ratsolute carrier family 15 member 1 os=rattus norvegicus gn=slc15a1 pe=2 sv=1	10.5056	0.0443
comp80100_c0_seq2	---NA---	-8.6952	0.0369
comp802_c0_seq1	nu2m_lumtenadh-ubiquinone oxidoreductase chain 2 os=lumbricus terrestris gn=nd2 pe=3 sv=1	-9.9424	0.0364
comp8096_c0_seq1	---NA---	6.0127	0.0441
comp8113_c0_seq1	nusap_danrenucleolar and spindle-associated protein 1 os=danio rerio gn=nusap1 pe=2 sv=2	-2.4561	0.0474
comp82618_c0_seq1	---NA---	9.3988	0.0347
comp82709_c0_seq1	---NA---	-8.0869	0.0481
comp83195_c0_seq1	---NA---	-8.7143	0.0308
comp83419_c0_seq1	---NA---	-7.592	0.0464
comp83981_c0_seq1	---NA---	-6.4345	0.0474
comp84_c22_seq8	---NA---	-7.388	0.0386
comp84248_c0_seq1	---NA---	-9.481	0.0377
comp8468_c0_seq11	---NA---	4.0657	0.0305
comp85357_c0_seq1	tri33_danree3 ubiquitin-protein ligase trim33 os=danio rerio gn=trim33 pe=2 sv=1	-8.1202	0.0415
comp8575_c1_seq1	---NA---	-7.3527	0.027
comp86291_c0_seq1	---NA---	-9.8501	0.0363
comp86417_c0_seq1	---NA---	-9.3447	0.0428
comp865_c0_seq1	---NA---	-8.3682	0.0485
comp8671_c0_seq1	---NA---	3.7843	0.0363
comp8692_c0_seq1	---NA---	-11.2684	0.031
comp86985_c0_seq2	---NA---	-8.6891	0.0472
comp8703_c0_seq1	---NA---	4.0001	0.0051
comp8715_c0_seq1	---NA---	-10.3808	0.0409
comp8726_c1_seq1	---NA---	-7.0038	0.0468
comp87421_c0_seq1	---NA---	-9.0315	0.0443
comp875_c0_seq1	---NA---	4.5467	0.0455
comp87625_c0_seq1	---NA---	-7.8217	0.0461
comp8872_c0_seq1	---NA---	-8.986	0.0351
comp8935_c0_seq1	---NA---	8.1971	0.0129
comp895_c0_seq1	---NA---	-9.9422	0.0105
comp89589_c0_seq1	---NA---	-8.2757	0.049
comp8979_c0_seq8	---NA---	-8.212	0.0441
comp8985_c0_seq30	---NA---	-8.6626	0.0295
comp91343_c0_seq1	---NA---	-7.7175	0.031
comp924_c3_seq136	---NA---	-8.6075	0.0387
comp925_c0_seq1	---NA---	10.0461	0.0411
comp93_c19_seq2	---NA---	6.5421	0.0323
comp93_c23_seq173	---NA---	3.2397	0.0211
comp93_c24_seq1	---NA---	3.7468	0.0298
comp93764_c0_seq1	PREDICTED: uncharacterized protein LOC107334151	-7.8453	0.0351
comp9401_c0_seq4	cp2r1_mousevitamin d 25-hydroxylase os=mus musculus gn=cyp2r1 pe=2 sv=1	4.3589	0.0223
comp9449_c0_seq1	---NA---	-8.9204	0.0441
comp9449_c0_seq2	---NA---	-8.7938	0.0467
comp9484_c0_seq1	---NA---	-9.1108	0.0351
comp9484_c0_seq2	---NA---	-9.1108	0.0355
comp95666_c0_seq1	hypothetical protein HELRODRAFT_160760	-5.2756	0.0487
comp957_c3_seq1	---NA---	-7.7987	0.0328
comp957_c3_seq2	---NA---	-8.4056	0.0323
comp957_c4_seq1	---NA---	-9.1714	0.0369
comp959_c1_seq1	---NA---	2.6411	0.0406
comp963_c1_seq1	---NA---	-7.1281	0.0377
comp9659_c0_seq4	---NA---	9.4164	0.0372
comp970_c0_seq1	nu1m_lumtenadh-ubiquinone oxidoreductase chain 1 os=lumbricus terrestris gn=nd1 pe=3 sv=1	-10.1674	0.0372
comp9705_c0_seq1	---NA---	-8.9548	0.0487
comp97167_c0_seq1	---NA---	-8.7894	0.0455
comp979_c0_seq1	---NA---	2.7333	0.0363
comp9825_c0_seq1	---NA---	-7.8464	0.0459
comp986_c2_seq1	---NA---	2.729	0.0489
comp9865_c0_seq4	---NA---	6.717	0.0487
comp99434_c0_seq1	---NA---	-7.1195	0.0487

## Sheet: BSA_NP_large
SeqID_BSA	Seq_Description	BSA_large_logFC	BSA_large_FDR
comp2626_c1_seq253	---NA---	8.4246	0.0024
comp2626_c1_seq143	---NA---	8.2268	0.0032
comp8703_c0_seq1	---NA---	4.4499	0.0052
comp1170_c0_seq2	mt_eisfocadmium-metallothionein os=eisenia foetida gn=mt pe=1 sv=1	5.5877	0.0111
comp3095_c1_seq2	---NA---	7.4663	0.0121
comp30708_c0_seq1	---NA---	7.4442	0.0121
comp2626_c1_seq83	---NA---	3.5815	0.0121
comp1129_c0_seq121	---NA---	4.5079	0.0224
comp2240_c0_seq1	agrin_ratagrin os=rattus norvegicus gn=agrn pe=1 sv=2	8.4926	0.0224
comp3095_c0_seq2	---NA---	6.992	0.0268
comp22033_c0_seq2	samd9_humansterile alpha motif domain-containing protein 9 os=homo sapiens gn=samd9 pe=1 sv=1	-9.7256	0.0268

## Sheet: BSA_AG_low
SeqID_BSA	Seq_Description	BSA_Agion_low_logFC	BSA_Agion_low_FDR
comp2626_c1_seq253	---NA---	7.6713	0.0183
comp2626_c1_seq143	---NA---	7.6686	0.0183
comp30708_c0_seq1	---NA---	7.6821	0.0183
comp1587_c0_seq80	---NA---	4.0686	0.0418

## Sheet: BSA_Ag_high
SeqID_BSA	Seq_Description	BSA_Agion_high_logFC	BSA_Agion_high_FDR
comp5057_c0_seq1	---NA---	8.7895	0.0012
comp30708_c0_seq1	---NA---	7.711	0.0066
comp1587_c0_seq80	---NA---	4.5309	0.0066
comp13428_c0_seq1	---NA---	5.3068	0.0066
comp30262_c0_seq1	---NA---	10.1263	0.0066
comp142_c4_seq19	---NA---	12.068	0.0141
comp2626_c1_seq143	---NA---	7.4161	0.0153
comp142_c4_seq22	---NA---	9.9935	0.0153
comp7690_c2_seq41	---NA---	10.3918	0.0153
comp17161_c0_seq3	---NA---	7.4145	0.0274
comp8935_c0_seq1	---NA---	8.5512	0.0274
comp4363_c0_seq2	---NA---	6.0652	0.0274
comp11792_c0_seq1	---NA---	10.8123	0.0274
comp1170_c0_seq2	mt_eisfocadmium-metallothionein os=eisenia foetida gn=mt pe=1 sv=1	4.8852	0.0294
comp11792_c0_seq4	---NA---	10.8594	0.0294
comp7280_c0_seq5	---NA---	9.2445	0.034
comp1170_c0_seq1	---NA---	7.7695	0.0378
comp2626_c1_seq253	---NA---	6.8797	0.038
comp30828_c0_seq1	---NA---	5.4547	0.038
comp4472_c0_seq1	---NA---	5.8805	0.038
comp1678_c2_seq2	---NA---	-7.9437	0.038
comp142_c4_seq28	---NA---	12.1591	0.038
comp6615_c0_seq2	serine-type endopeptidase inhibitor activity	11.2531	0.0472
comp9580_c0_seq6	---NA---	-6.4803	0.0478
comp1657_c0_seq2	---NA---	4.9608	0.0481
comp6496_c0_seq5	spb3_humanserpin b3 os=homo sapiens gn=serpinb3 pe=1 sv=2	10.2362	0.0481
comp7583_c0_seq2	matn1_chickcartilage matrix protein os=gallus gallus gn=matn1 pe=1 sv=2	4.4793	0.0481
comp3332_c0_seq1	---NA---	11.5175	0.0481
comp9580_c0_seq1	---NA---	-5.9973	0.0481
