# Supplementary material for: Surface coating and particle size are main factors explaining the transcriptome-wide responses of the earthwormLumbricus rubellusto silver nanoparticles
Source: Royal Society of Chemistry journal article supplement (doi:10.1039/c9en01144g), 2020-01-01
Supplement: c9en01144g2.xlsx [file c9en01144g2.xlsx]

## Sheet: CH_NP_small
SeqID_BSA	Seq_Description	CH_small_logFC	CH_small_FDR
comp3095_c1_seq1	---NA---	11.7675	0.0003
comp37120_c0_seq1	apra_dicdiautocrine proliferation repressor protein a os=dictyostelium discoideum gn=apra pe=1 sv=1	-5.2623	0.0012
comp5565_c0_seq2	---NA---	11.8399	0.0033
comp3817_c0_seq1	---NA---	10.7343	0.0048
comp11412_c0_seq1	---NA---	7.5774	0.0048
comp910_c0_seq18	---NA---	-10.8091	0.0048
comp1276_c0_seq24	leukocyte cell-derived chemotaxin 1 isoform X1	3.2023	0.0134
comp3095_c1_seq2	---NA---	7.2132	0.0185
comp5565_c0_seq5	---NA---	10.975	0.0185
comp1276_c0_seq21	leukocyte cell-derived chemotaxin 1	3.1625	0.0185
comp1077_c0_seq2	---NA---	4.4645	0.0185
comp1788_c0_seq1	fstl1_ratfollistatin-related protein 1 os=rattus norvegicus gn=fstl1 pe=1 sv=1	7.8961	0.0187
comp1276_c0_seq8	leukocyte cell-derived chemotaxin 1	3.287	0.0207
comp910_c0_seq57	---NA---	-5.7402	0.03
comp5565_c0_seq11	---NA---	10.5467	0.0317
comp910_c0_seq63	---NA---	-7.7207	0.0317
comp910_c0_seq71	---NA---	-5.3465	0.0317
comp1170_c0_seq1	---NA---	5.3545	0.037
comp529_c2_seq4	---NA---	9.4332	0.037
comp4856_c0_seq1	---NA---	4.3929	0.037
comp2509_c0_seq1	---NA---	4.2552	0.04
comp19152_c0_seq1	---NA---	-8.8521	0.0405
comp2557_c5_seq20	---NA---	7.9663	0.0454

## Sheet: CH_NP_medium
SeqID_BSA	Seq_Description	CH_med_logFC	CH_med_FDR
comp102190_c0_seq1	---NA---	-6.1955	0.0365
comp102581_c0_seq1	---NA---	7.9003	0.0385
comp10259_c0_seq1	av71_acavimuscle cell intermediate filament protein av71 os=acanthocheilonema viteae gn=av71 pe=2 sv=1	-6.4258	0.0485
comp1077_c0_seq2	---NA---	3.7934	0.0271
comp1077_c0_seq3	---NA---	3.9043	0.0463
comp1093_c0_seq10	---NA---	-7.836	0.0045
comp1093_c0_seq3	---NA---	-7.4715	0.0056
comp1129_c0_seq101	---NA---	4.4059	0.0404
comp1129_c0_seq62	---NA---	4.3173	0.0338
comp1142_c0_seq63	sbspo_bovinsomatomedin-b and thrombospondin type-1 domain-containing protein os=bos taurus gn=sbspon pe=2 sv=2	5.219	0.0111
comp11447_c0_seq3	peam1_arathphosphoethanolamine n-methyltransferase 1 os=arabidopsis thaliana gn=nmt1 pe=2 sv=1	-3.3323	0.0385
comp1150_c2_seq16	---NA---	4.5468	0.0264
comp1150_c2_seq27	---NA---	3.6597	0.0323
comp1150_c2_seq34	---NA---	4.0561	0.0488
comp1150_c2_seq47	---NA---	3.9654	0.048
comp1170_c0_seq1	---NA---	6.2217	0.0038
comp1170_c0_seq2	mt_eisfocadmium-metallothionein os=eisenia foetida gn=mt pe=1 sv=1	3.8063	0.0467
comp11789_c0_seq1	cytochrome-c oxidase activity	-8.3348	0.0428
comp11983_c0_seq1	---NA---	10.6297	0.0072
comp12175_c0_seq27	---NA---	-9.2233	0.0428
comp12175_c0_seq5	---NA---	-8.1939	0.0476
comp12175_c0_seq8	---NA---	-8.788	0.0365
comp12217_c0_seq2	znt1_macfazinc transporter 1 os=macaca fascicularis gn=slc30a1 pe=2 sv=1	5.3249	0.0496
comp12272_c0_seq1	---NA---	-9.7605	0.031
comp12272_c0_seq2	---NA---	-9.2775	0.0365
comp12418_c1_seq3	---NA---	-8.1365	0.0478
comp12528_c0_seq2	---NA---	-7.0105	0.0486
comp1254_c0_seq2	---NA---	4.2437	0.0062
comp13237_c0_seq1	---NA---	6.212	0.0488
comp13474_c0_seq13	up-regulator of cell proliferation-like	-4.6929	0.0479
comp13474_c0_seq17	up-regulator of cell proliferation-like	-8.4318	0.0059
comp13474_c0_seq19	up-regulator of cell proliferation-like	-8.1963	0.0088
comp13474_c0_seq5	up-regulator of cell proliferation-like	-7.8847	0.0263
comp13573_c0_seq1	---NA---	10.1281	0.0382
comp14177_c0_seq1	hdc_dromeheadcase protein os=drosophila melanogaster gn=hdc pe=1 sv=2	3.8906	0.0475
comp1439_c2_seq2	---NA---	6.5077	0.0313
comp14483_c0_seq1	---NA---	3.7899	0.0428
comp1462_c0_seq1	---NA---	10.1107	0.0056
comp14656_c0_seq1	---NA---	7.396	0.0038
comp14870_c0_seq10	---NA---	10.5078	0.0428
comp14870_c0_seq3	---NA---	10.9611	0.0248
comp14870_c0_seq7	---NA---	6.2665	0.0428
comp14870_c0_seq9	---NA---	9.1269	0.025
comp15086_c0_seq3	hypothetical protein HELRODRAFT_192918	9.4829	0.0213
comp1515_c0_seq1	---NA---	-9.7549	0.0428
comp15183_c0_seq1	pi16_humanpeptidase inhibitor 16 os=homo sapiens gn=pi16 pe=1 sv=1	-8.3325	0.0475
comp15216_c0_seq1	---NA---	-6.3062	0.0429
comp15229_c0_seq4	---NA---	-8.2203	0.0485
comp15451_c0_seq1	hdc_dromeheadcase protein os=drosophila melanogaster gn=hdc pe=1 sv=2	4.4949	0.0488
comp1563_c0_seq1	grn_mousegranulins os=mus musculus gn=grn pe=1 sv=2	4.7398	0.0313
comp159_c0_seq29	hypothetical protein CGI_10028476	4.5852	0.0062
comp159_c0_seq42	hypothetical protein CGI_10028476	3.546	0.0488
comp159_c0_seq5	hypothetical protein CGI_10028476	4.4201	0.004
comp1639_c1_seq1	---NA---	-8.0974	0.0365
comp1639_c1_seq2	---NA---	-7.5068	0.0476
comp1639_c1_seq6	---NA---	-8.1318	0.0156
comp16432_c0_seq3	---NA---	-9.1736	0.0263
comp16680_c0_seq1	---NA---	3.3295	0.0404
comp17285_c1_seq2	---NA---	8.2447	0.0308
comp17466_c0_seq2	---NA---	-6.545	0.0404
comp1788_c0_seq1	fstl1_ratfollistatin-related protein 1 os=rattus norvegicus gn=fstl1 pe=1 sv=1	7.4851	0.0099
comp18148_c0_seq12	hypothetical protein: PROVISIONAL	-7.0935	0.0404
comp18234_c0_seq1	---NA---	-7.8783	0.0301
comp18234_c0_seq2	---NA---	-8.6694	0.0186
comp19391_c0_seq1	---NA---	-8.5368	0.0056
comp19897_c0_seq22	uncharacterized protein LOC111088095	-9.0452	0.0476
comp2029_c0_seq5	---NA---	7.2302	0.0485
comp20425_c0_seq1	---NA---	-7.6619	0.0385
comp20754_c0_seq3	---NA---	8.1949	0.0248
comp20810_c0_seq1	---NA---	8.801	0.0014
comp2139_c0_seq5	c1qt3_mousecomplement c1q tumor necrosis factor-related protein 3 os=mus musculus gn=c1qtnf3 pe=2 sv=1	-8.2163	0.041
comp21568_c0_seq3	---NA---	-7.3526	0.0414
comp21568_c0_seq4	---NA---	-7.6152	0.0435
comp21568_c0_seq5	---NA---	-6.7622	0.0452
comp21773_c0_seq2	---NA---	-7.4224	0.029
comp2190_c0_seq2	at1a2_ratsodium potassium-transporting atpase subunit alpha-2 os=rattus norvegicus gn=atp1a2 pe=1 sv=1	5.6431	0.0004
comp21996_c0_seq1	---NA---	6.3362	0.0033
comp2220_c1_seq1	---NA---	-6.1622	0.0476
comp22215_c0_seq2	fgl1_bovinfibrinogen-like protein 1 os=bos taurus gn=fgl1 pe=2 sv=1	-8.1471	0.0062
comp2232_c2_seq1	hypothetical protein HELRODRAFT_176332	3.4932	0.0406
comp2232_c2_seq3	hypothetical protein HELRODRAFT_176332	3.774	0.0168
comp2232_c2_seq6	tripartite motif-containing protein 2-like	4.2644	0.0213
comp2232_c2_seq7	hypothetical protein HELRODRAFT_176332	2.918	0.0486
comp2232_c2_seq8	hypothetical protein HELRODRAFT_176332	3.2582	0.0315
comp2272_c0_seq34	---NA---	4.9884	0.0172
comp2272_c0_seq37	---NA---	4.7564	0.029
comp2301_c0_seq5	cas4_ephmushort-chain collagen c4 os=ephydatia muelleri pe=2 sv=1	4.4359	0.0187
comp232_c0_seq1	cox2_lumtecytochrome c oxidase subunit 2 os=lumbricus terrestris gn=coii pe=3 sv=1	-9.3862	0.0488
comp2376_c0_seq1	---NA---	6.4596	0.0476
comp243_c6_seq120	anta_hydvuantistasin os=hydra vulgaris pe=2 sv=1	6.7005	0.0279
comp24492_c0_seq2	integral component of membrane	6.0471	0.0248
comp245_c4_seq29	---NA---	10.6223	0.0004
comp25076_c0_seq1	calcium ion binding	-6.4552	0.0073
comp2509_c0_seq1	---NA---	3.777	0.0365
comp2537_c0_seq1	hypothetical protein IscW_ISCW013786	-8.3932	0.0476
comp2557_c5_seq20	---NA---	6.9403	0.0475
comp2577_c0_seq14	---NA---	-8.5982	0.0057
comp2577_c0_seq22	---NA---	-7.99	0.0004
comp2577_c0_seq24	---NA---	-9.0571	0.0045
comp2577_c0_seq3	---NA---	-8.2928	0.0038
comp2577_c0_seq5	---NA---	-7.5283	0.0248
comp2577_c0_seq8	---NA---	-8.6917	0.0057
comp25984_c0_seq1	---NA---	-7.8486	0.0382
comp2610_c0_seq208	---NA---	5.0141	0.012
comp2610_c0_seq209	---NA---	9.5845	0
comp26117_c0_seq11	---NA---	-6.3837	0.0381
comp26633_c0_seq2	---NA---	7.2917	0.0488
comp2728_c1_seq17	---NA---	-6.4501	0.0413
comp2752_c1_seq1	eki1_mouseethanolamine kinase 1 os=mus musculus gn=etnk1 pe=2 sv=1	3.8318	0.0462
comp28849_c1_seq3	tri56_humane3 ubiquitin-protein ligase trim56 os=homo sapiens gn=trim56 pe=1 sv=3	-2.6068	0.0365
comp30227_c0_seq1	---NA---	7.9532	0.0301
comp30913_c0_seq2	hypothetical protein HELRODRAFT_175307	-11.7167	0.0011
comp3095_c1_seq1	---NA---	11.2482	0.0003
comp3095_c1_seq2	---NA---	6.0749	0.0248
comp31734_c0_seq1	---NA---	-8.7372	0.0385
comp32000_c0_seq1	pol3_dromeretrovirus-related pol polyprotein from transposon os=drosophila melanogaster gn=pol pe=4 sv=1	-9.4684	0.004
comp32181_c0_seq1	---NA---	-8.8995	0.0428
comp32420_c0_seq1	coea1_chickcollagen alpha-1 chain os=gallus gallus gn=col14a1 pe=1 sv=2	-6.9926	0.0463
comp32539_c0_seq2	---NA---	7.7969	0.0381
comp327_c3_seq23	ch3l2_humanchitinase-3-like protein 2 os=homo sapiens gn=chi3l2 pe=1 sv=1	5.9228	0.0263
comp328_c0_seq2	C-type lectin 37Db-like	8.2761	0.029
comp3296_c0_seq4	agrin_humanagrin os=homo sapiens gn=agrn pe=1 sv=4	4.6289	0.0476
comp330_c0_seq9	---NA---	10.1306	0.0436
comp3303_c0_seq1	---NA---	6.7904	0.0029
comp3314_c0_seq10	ileu_horseleukocyte elastase inhibitor os=equus caballus gn=serpinb1 pe=1 sv=3	3.9095	0.0375
comp3314_c0_seq12	ileu_horseleukocyte elastase inhibitor os=equus caballus gn=serpinb1 pe=1 sv=3	4.6095	0.0213
comp3314_c0_seq24	ileu_horseleukocyte elastase inhibitor os=equus caballus gn=serpinb1 pe=1 sv=3	4.2885	0.029
comp3314_c0_seq28	ileu_horseleukocyte elastase inhibitor os=equus caballus gn=serpinb1 pe=1 sv=3	3.7248	0.0413
comp3314_c0_seq4	ileu_horseleukocyte elastase inhibitor os=equus caballus gn=serpinb1 pe=1 sv=3	4.6946	0.0186
comp3314_c0_seq8	ileu_horseleukocyte elastase inhibitor os=equus caballus gn=serpinb1 pe=1 sv=3	4.5442	0.0213
comp333_c4_seq10	neurm_hirmeneuromacin os=hirudo medicinalis pe=3 sv=1	4.1033	0.0338
comp333_c4_seq19	neurm_hirmeneuromacin os=hirudo medicinalis pe=3 sv=1	5.8365	0.004
comp333_c4_seq7	neurm_hirmeneuromacin os=hirudo medicinalis pe=3 sv=1	5.2364	0.004
comp333_c4_seq9	neurm_hirmeneuromacin os=hirudo medicinalis pe=3 sv=1	4.5268	0.031
comp33721_c0_seq1	---NA---	-8.6075	0.0493
comp3393_c0_seq9	tgmh_tactrhemocyte protein-glutamine gamma-glutamyltransferase os=tachypleus tridentatus pe=1 sv=1	4.0653	0.0385
comp34364_c0_seq1	---NA---	-9.5239	0.0263
comp3528_c0_seq2	tri18_ratmidline-1 os=rattus norvegicus gn=mid1 pe=2 sv=1	6.3654	0.004
comp3607_c0_seq1	protein binding	8.7549	0.0263
comp3629_c0_seq1	---NA---	7.6826	0.0496
comp3629_c0_seq4	---NA---	6.9826	0.0455
comp36402_c1_seq2	---NA---	-6.6448	0.0478
comp36715_c0_seq2	---NA---	-8.9247	0.0467
comp36764_c0_seq1	PAR14_MOUSEPoly	-9.0845	0.0111
comp3706_c0_seq1	fibc_lumrufibrinolytic isozyme c os=lumbricus rubellus pe=1 sv=1	-8.7132	0.0496
comp37120_c0_seq1	apra_dicdiautocrine proliferation repressor protein a os=dictyostelium discoideum gn=apra pe=1 sv=1	-3.5787	0.0263
comp37342_c0_seq1	---NA---	-7.6709	0.0461
comp3754_c0_seq1	Lytic polysaccharide monooxygenase	-7.4373	0.0263
comp3817_c0_seq1	---NA---	8.9698	0.011
comp38241_c0_seq4	pol2_mouseretrovirus-related pol polyprotein line-1 os=mus musculus gn=pol pe=1 sv=2	-5.6915	0.0181
comp3919_c0_seq1	---NA---	-9.4099	0.0404
comp39953_c0_seq2	---NA---	-8.2212	0.0365
comp400_c3_seq3	---NA---	3.1449	0.0327
comp40865_c0_seq1	---NA---	-8.0804	0.0315
comp4179_c0_seq1	---NA---	8.1623	0.0455
comp4268_c0_seq3	---NA---	-7.2734	0.0214
comp42727_c0_seq1	---NA---	-7.3242	0.0404
comp43932_c0_seq1	---NA---	7.37	0.0488
comp448_c5_seq1	---NA---	5.7046	0.0056
comp448_c5_seq104	tssk2_mousetestis-specific serine threonine-protein kinase 2 os=mus musculus gn=tssk2 pe=1 sv=2	5.5448	0.022
comp448_c5_seq11	---NA---	4.6908	0.0056
comp448_c5_seq33	tssk2_mousetestis-specific serine threonine-protein kinase 2 os=mus musculus gn=tssk2 pe=1 sv=2	6.5103	0.0003
comp448_c5_seq62	---NA---	5.0109	0.0029
comp448_c5_seq96	---NA---	5.2322	0.0111
comp45269_c0_seq1	---NA---	-7.7336	0.0385
comp45335_c0_seq3	---NA---	-7.2311	0.0484
comp45653_c0_seq2	---NA---	-7.7987	0.023
comp45904_c0_seq2	---NA---	-7.8191	0.0488
comp46072_c0_seq3	---NA---	-7.1618	0.0111
comp4704_c0_seq1	mt_eisfocadmium-metallothionein os=eisenia foetida gn=mt pe=1 sv=1	3.271	0.0099
comp4727_c0_seq1	---NA---	9.701	0.0082
comp47725_c0_seq1	---NA---	-7.2804	0.0492
comp4856_c0_seq1	---NA---	5.07	0.0037
comp49005_c0_seq3	---NA---	-5.4907	0.0476
comp49518_c0_seq1	---NA---	-8.0287	0.0404
comp5017_c0_seq3	---NA---	8.1053	0.0476
comp50895_c0_seq1	---NA---	8.0489	0.0385
comp5134_c1_seq2	mitochondrion;ATPase inhibitor activity;negative regulation of ATPase activity	6.7777	0.031
comp5134_c1_seq4	mitochondrion;ATPase inhibitor activity;negative regulation of ATPase activity	6.3585	0.0467
comp5179_c0_seq1	tri18_humanmidline-1 os=homo sapiens gn=mid1 pe=1 sv=1	-6.6534	0.0248
comp5179_c0_seq3	trim1_mouseprobable e3 ubiquitin-protein ligase mid2 os=mus musculus gn=mid2 pe=2 sv=2	-5.7737	0.0404
comp5201_c0_seq22	---NA---	6.2221	0.0428
comp5201_c0_seq4	---NA---	6.3242	0.0385
comp5201_c0_seq44	---NA---	6.0678	0.0455
comp5201_c0_seq61	---NA---	5.9738	0.0419
comp5274_c0_seq1	grn_humangranulins os=homo sapiens gn=grn pe=1 sv=2	-8.8667	0.0435
comp529_c2_seq13	agrin_mouseagrin os=mus musculus gn=agrn pe=1 sv=1	4.9926	0.0414
comp529_c2_seq14	agrin_ratagrin os=rattus norvegicus gn=agrn pe=1 sv=2	4.758	0.0476
comp529_c2_seq28	agrin_humanagrin os=homo sapiens gn=agrn pe=1 sv=4	4.8033	0.0483
comp529_c2_seq4	---NA---	10.3638	0.0056
comp5502_c4_seq1	---NA---	-6.4512	0.031
comp5502_c4_seq2	---NA---	-6.6696	0.0296
comp5558_c0_seq2	---NA---	-5.3954	0.0111
comp5565_c0_seq11	---NA---	9.4599	0.0263
comp5565_c0_seq2	---NA---	11.3856	0.0021
comp5565_c0_seq4	---NA---	8.775	0.0428
comp5565_c0_seq5	---NA---	10.4323	0.0078
comp56374_c0_seq1	---NA---	-6.9454	0.0428
comp571_c0_seq2	cana_dromecalpain-a os=drosophila melanogaster gn= pe=1 sv=2	8.3246	0.0476
comp576_c2_seq6	assy_xentrargininosuccinate synthase os=xenopus tropicalis gn=ass1 pe=2 sv=1	4.0921	0.0476
comp6157_c0_seq1	leucine-rich repeat-containing protein 14-like	2.8115	0.0475
comp6246_c0_seq3	---NA---	7.0108	0.0428
comp640_c1_seq1	---NA---	-7.632	0.0488
comp66245_c0_seq1	---NA---	-6.8893	0.0488
comp66502_c0_seq1	dchs_dromehistidine decarboxylase os=drosophila melanogaster gn=hdc pe=2 sv=2	-6.4751	0.0385
comp6687_c0_seq1	cbs_macfacystathionine beta-synthase os=macaca fascicularis gn=cbs pe=2 sv=3	6.4821	0.0165
comp6687_c0_seq3	cbs_macfacystathionine beta-synthase os=macaca fascicularis gn=cbs pe=2 sv=3	6.2516	0.0193
comp679_c0_seq1	---NA---	7.4265	0.0486
comp6875_c0_seq1	---NA---	-8.3446	0.0493
comp688_c0_seq15	---NA---	-6.6146	0.0467
comp703_c8_seq639	---NA---	5.9735	0.0485
comp708_c1_seq2	PREDICTED: uncharacterized protein LOC106607957	2.6333	0.0231
comp708_c1_seq4	PREDICTED: uncharacterized protein LOC106607957	2.5015	0.0315
comp7122_c0_seq1	---NA---	-11.3619	0.0211
comp7152_c0_seq1	---NA---	-7.7416	0.0435
comp7303_c2_seq2	AChain A, Crystal Structure Of The Earthworm R-Type Lectin C-Half In Complex With Galnac	-5.7578	0.0385
comp7324_c0_seq1	---NA---	-8.7689	0.0488
comp7327_c0_seq10	---NA---	-8.3855	0.0413
comp748_c1_seq1	leg1_haeco32 kda beta-galactoside-binding lectin os=haemonchus contortus gn=gal-1 pe=2 sv=1	5.6018	0.0488
comp7517_c0_seq1	---NA---	7.7983	0.0248
comp7542_c0_seq1	---NA---	3.6095	0.0404
comp75876_c0_seq1	sl9a1_mousesodium hydrogen exchanger 1 os=mus musculus gn=slc9a1 pe=1 sv=1	-6.4246	0.0301
comp77224_c0_seq1	---NA---	-8.9566	0.0293
comp7767_c0_seq1	regenerating islet-derived protein 4	11.8215	0.0394
comp7767_c0_seq2	leca_sarpelectin subunit alpha os=sarcophaga peregrina pe=1 sv=1	11.5832	0.0385
comp7900_c0_seq1	---NA---	5.6505	0.0436
comp7918_c0_seq4	---NA---	-7.8005	0.0214
comp8222_c0_seq5	s13a2_mousesolute carrier family 13 member 2 os=mus musculus gn=slc13a2 pe=2 sv=1	4.7092	0.0476
comp8233_c0_seq1	cbs_ratcystathionine beta-synthase os=rattus norvegicus gn=cbs pe=1 sv=3	7.9717	0.0043
comp86613_c0_seq1	---NA---	-9.0966	0.0099
comp8872_c0_seq1	---NA---	-8.286	0.0455
comp910_c0_seq1	---NA---	-8.244	0.0062
comp910_c0_seq16	---NA---	-10.6843	0.025
comp910_c0_seq18	---NA---	-10.8091	0.0006
comp910_c0_seq26	---NA---	-11.2231	0.0056
comp910_c0_seq4	---NA---	-9.3897	0.0093
comp910_c0_seq57	---NA---	-5.8031	0.0073
comp910_c0_seq6	---NA---	-10.6636	0.0056
comp910_c0_seq66	---NA---	-7.8247	0.0081
comp910_c0_seq70	---NA---	-10.5428	0.0056
comp910_c0_seq71	---NA---	-5.1537	0.0144
comp910_c0_seq9	---NA---	-11.2375	0.0355
comp9401_c0_seq4	cp2r1_mousevitamin d 25-hydroxylase os=mus musculus gn=cyp2r1 pe=2 sv=1	3.8775	0.0406
comp957_c3_seq2	---NA---	-8.9238	0.035
comp957_c4_seq1	---NA---	-9.325	0.0308
comp9647_c0_seq1	secg_dicdiankyrin ph and sec7 domain containing protein secg os=dictyostelium discoideum gn=secg pe=2 sv=1	4.5785	0.0313

## Sheet: CH_NP_large
SeqID_BSA	Seq_Description	CH_large_logFC	CH_large_FDR
comp6453_c0_seq2	lipid binding	-10.1666	0.0001
comp30913_c0_seq2	hypothetical protein HELRODRAFT_175307	-11.7167	0.0128
comp3095_c1_seq1	---NA---	8.8789	0.0395
comp4856_c0_seq1	---NA---	4.6397	0.0395
comp1129_c0_seq62	---NA---	5.325	0.0395
comp453_c0_seq24	chit1_humanchitotriosidase-1 os=homo sapiens gn=chit1 pe=1 sv=1	-8.258	0.0395
comp453_c0_seq17	chit1_humanchitotriosidase-1 os=homo sapiens gn=chit1 pe=1 sv=1	-8.3516	0.0395
comp2577_c0_seq22	---NA---	-6.1057	0.0497
comp21996_c0_seq1	---NA---	5.5065	0.0497
comp37120_c0_seq1	apra_dicdiautocrine proliferation repressor protein a os=dictyostelium discoideum gn=apra pe=1 sv=1	-3.9693	0.0497
comp1129_c0_seq101	---NA---	5.2605	0.0497
comp453_c0_seq12	chit1_humanchitotriosidase-1 os=homo sapiens gn=chit1 pe=1 sv=1	-7.875	0.0497

## Sheet: CH_Ag_low
SeqID_BSA	Seq_Description	CH_Agion_low_logFC	CH_Agion_low_FDR
comp6575_c0_seq1	cubn_ratcubilin os=rattus norvegicus gn=cubn pe=1 sv=2	7.8481	0.0202
comp6575_c0_seq2	cubn_mousecubilin os=mus musculus gn=cubn pe=1 sv=3	8.5062	0.0208
comp30913_c0_seq2	hypothetical protein HELRODRAFT_175307	-11.7167	0.021
comp3754_c0_seq1	Lytic polysaccharide monooxygenase	-8.9953	0.0362
comp6575_c0_seq3	---NA---	6.6611	0.0362
comp835_c1_seq129	hypothetical protein	-4.7224	0.0362
comp9012_c0_seq42	---NA---	-8.1465	0.0362
comp9012_c0_seq233	---NA---	-8.014	0.0362
comp9012_c0_seq259	---NA---	-7.9689	0.0399
comp9012_c0_seq116	---NA---	-7.8206	0.0399
comp9012_c0_seq5	---NA---	-8.2135	0.0399
comp9012_c0_seq1	---NA---	-8.0946	0.0455

## Sheet: CH_AG_high
SeqID_BSA	Seq_Description	CH_Agion_high_logFC	CH_Agion_high_FDR
comp1150_c2_seq16	---NA---	5.174	0.0284
comp1150_c2_seq27	---NA---	4.2526	0.0284
comp1150_c2_seq34	---NA---	4.8021	0.0439
comp1150_c2_seq47	---NA---	4.6562	0.0439
comp1171_c0_seq3	reverse transcriptase-like	6.1145	0.0253
comp1283_c0_seq9	---NA---	8.7083	0
comp14024_c0_seq2	y3136_arathclavaminate synthase-like protein at3g21360 os=arabidopsis thaliana gn=at3g21360 pe=1 sv=1	-5.2446	0.0432
comp1533_c0_seq1	hypothetical protein CAPTEDRAFT_138466	-5.5668	0.0253
comp1612_c0_seq1	cpsm_litctcarbamoyl-phosphate synthase	3.9008	0.0361
comp17098_c1_seq1	---NA---	-8.8729	0.0439
comp19064_c0_seq1	---NA---	8.2802	0.0385
comp2301_c0_seq5	cas4_ephmushort-chain collagen c4 os=ephydatia muelleri pe=2 sv=1	6.6592	0.0003
comp2355_c2_seq73	dmbt1_mousedeleted in malignant brain tumors 1 protein os=mus musculus gn=dmbt1 pe=1 sv=2	4.0025	0.0385
comp25395_c0_seq1	---NA---	8.0944	0.0253
comp327_c3_seq23	ch3l2_humanchitinase-3-like protein 2 os=homo sapiens gn=chi3l2 pe=1 sv=1	6.4995	0.0322
comp3528_c0_seq2	tri18_ratmidline-1 os=rattus norvegicus gn=mid1 pe=2 sv=1	6.347	0.0145
comp41_c45_seq37	uncharacterized protein LOC110055472	-8.7266	0.0361
comp44942_c0_seq1	---NA---	10.8398	0.0218
comp56374_c0_seq1	---NA---	-9.8172	0.0385
comp6519_c0_seq10	uncharacterized protein LOC106153441	-3.7885	0.0294
comp6575_c0_seq1	cubn_ratcubilin os=rattus norvegicus gn=cubn pe=1 sv=2	6.5925	0.0285
comp6575_c0_seq2	cubn_mousecubilin os=mus musculus gn=cubn pe=1 sv=3	6.9704	0.0385
comp6687_c0_seq1	cbs_macfacystathionine beta-synthase os=macaca fascicularis gn=cbs pe=2 sv=3	6.533	0.0385
comp6687_c0_seq3	cbs_macfacystathionine beta-synthase os=macaca fascicularis gn=cbs pe=2 sv=3	6.2384	0.0439
comp8233_c0_seq1	cbs_ratcystathionine beta-synthase os=rattus norvegicus gn=cbs pe=1 sv=3	8.3128	0.0092
comp86417_c0_seq1	---NA---	7.7916	0.0004
comp868_c0_seq5	mt_eisfocadmium-metallothionein os=eisenia foetida gn=mt pe=1 sv=1	2.9297	0.0218
comp8755_c0_seq1	---NA---	-8.6328	0.0218
comp887_c1_seq3	---NA---	-10.4383	0.0386
comp910_c0_seq41	---NA---	-7.495	0.0361
comp9647_c0_seq1	secg_dicdiankyrin ph and sec7 domain containing protein secg os=dictyostelium discoideum gn=secg pe=2 sv=1	5.5185	0.0218
