# Supplementary material for: Surface coating and particle size are main factors explaining the transcriptome-wide responses of the earthwormLumbricus rubellusto silver nanoparticles
Source: Royal Society of Chemistry journal article supplement (doi:10.1039/c9en01144g), 2020-01-01
Supplement: c9en01144g3.xlsx [file c9en01144g3.xlsx]

## Sheet: PVP_NP_small
SeqID_BSA	Seq_Description	PVP_small_logFC	PVP_small_FDR
comp7767_c0_seq2	leca_sarpelectin subunit alpha os=sarcophaga peregrina pe=1 sv=1	8.1909	0.0005
comp2509_c0_seq1	---NA---	7.253	0.0024
comp2989_c0_seq1	---NA---	-6.4185	0.0027
comp2509_c0_seq2	---NA---	7.5316	0.0053
comp2989_c0_seq10	---NA---	-4.8626	0.0095
comp2010_c0_seq1	---NA---	8.9222	0.0169
comp688_c0_seq4	---NA---	7.4494	0.0184
comp18001_c0_seq1	---NA---	5.2977	0.0184
comp53_c11_seq49	integral membrane protein 2B-like	-3.7693	0.0184
comp5005_c0_seq3	---NA---	-5.7693	0.0184
comp28017_c0_seq3	---NA---	-4.1717	0.0184
comp855_c0_seq8	---NA---	-6.0759	0.0184
comp855_c0_seq6	---NA---	-6.0294	0.019
comp18490_c0_seq1	casp7_mousecaspase-7 os=mus musculus gn=casp7 pe=1 sv=2	10.1275	0.021
comp2989_c0_seq12	zar1_danrezygote arrest protein 1 os=danio rerio gn=zar1 pe=2 sv=1	-4.1693	0.021
comp855_c0_seq4	---NA---	-5.9349	0.0217
comp28017_c0_seq1	---NA---	-3.7663	0.0217
comp5565_c0_seq2	---NA---	10.1911	0.029
comp2989_c0_seq9	---NA---	-4.1315	0.029
comp53_c11_seq185	fsta_danrefollistatin-a os=danio rerio gn=fsta pe=2 sv=2	-3.9475	0.029
comp39569_c0_seq3	---NA---	-5.2119	0.029
comp28017_c0_seq8	---NA---	-3.8791	0.029
comp41546_c0_seq2	---NA---	-4.166	0.029
comp53_c11_seq313	mcpi_melcpfour-domain proteases inhibitor os=melithaea caledonica pe=1 sv=1	-3.9223	0.0296

## Sheet: PVP_NP_medium
SeqID_BSA	Seq_Description	PVP_med_logFC	PVP_med_FDR
comp1134_c0_seq3	---NA---	-10.9957	0.0002
comp1169_c0_seq2	---NA---	-10.0608	0.0031
comp1169_c0_seq3	---NA---	-10.1129	0.0036
comp1169_c0_seq4	---NA---	-10.6665	0.0023
comp1170_c0_seq2	mt_eisfocadmium-metallothionein os=eisenia foetida gn=mt pe=1 sv=1	3.2627	0.0206
comp1204_c0_seq1	hgf_felcahepatocyte growth factor os=felis catus gn=hgf pe=2 sv=1	-10.9137	0.0001
comp1204_c0_seq10	thrb_bovinprothrombin os=bos taurus gn=f2 pe=1 sv=2	-11.1021	0.0002
comp1204_c0_seq11	plmn_humanplasminogen os=homo sapiens gn=plg pe=1 sv=2	-10.4894	0.0002
comp1204_c0_seq13	hgf_canfahepatocyte growth factor os=canis familiaris gn=hgf pe=2 sv=1	-11.0374	0.0001
comp1204_c0_seq17	plmn_humanplasminogen os=homo sapiens gn=plg pe=1 sv=2	-9.7923	0.0004
comp1204_c0_seq3	hgf_felcahepatocyte growth factor os=felis catus gn=hgf pe=2 sv=1	-10.1573	0.0002
comp1204_c0_seq4	ror1_humantyrosine-protein kinase transmembrane receptor ror1 os=homo sapiens gn=ror1 pe=1 sv=2	-9.566	0.0002
comp1204_c0_seq5	ror1_humantyrosine-protein kinase transmembrane receptor ror1 os=homo sapiens gn=ror1 pe=1 sv=2	-10.2767	0.0001
comp14061_c1_seq1	---NA---	-5.0847	0.0062
comp14120_c0_seq2	---NA---	10.9042	0.0439
comp14177_c0_seq1	hdc_dromeheadcase protein os=drosophila melanogaster gn=hdc pe=1 sv=2	4.6226	0.0166
comp14288_c0_seq1	pdia6_caeelprobable protein disulfide-isomerase a6 os=caenorhabditis elegans gn=tag-320 pe=2 sv=1	-9.4159	0.0366
comp1431_c0_seq1	---NA---	-6.5533	0.0468
comp14862_c0_seq1	---NA---	-9.8191	0.0038
comp15219_c0_seq2	---NA---	-8.7108	0.0344
comp15451_c0_seq1	hdc_dromeheadcase protein os=drosophila melanogaster gn=hdc pe=1 sv=2	4.2774	0.0381
comp15487_c0_seq1	crim1_danrecysteine-rich motor neuron 1 protein os=danio rerio gn=crim1 pe=2 sv=1	-11.4554	0.0013
comp1752_c0_seq1	oit3_ratoncoprotein-induced transcript 3 protein os=rattus norvegicus gn=oit3 pe=2 sv=1	-9.9125	0.0009
comp18001_c0_seq1	---NA---	5.2352	0.0062
comp18148_c0_seq1	hypothetical protein RhiirC2_792561	10.5341	0.027
comp18148_c0_seq10	hypothetical protein RhiirC2_792561	11.1086	0.0174
comp18148_c0_seq18	hypothetical protein RhiirC2_792561	10.342	0.0234
comp18490_c0_seq1	casp7_mousecaspase-7 os=mus musculus gn=casp7 pe=1 sv=2	10.0083	0.0078
comp20065_c0_seq1	chondroitin proteoglycan-2-like	-11.4228	0.0023
comp2026_c0_seq1	catc_humandipeptidyl peptidase 1 os=homo sapiens gn=ctsc pe=1 sv=2	-12.0764	0.015
comp22805_c0_seq2	co6a4_mousecollagen alpha-4 chain os=mus musculus gn=col6a4 pe=1 sv=2	-8.9428	0.0451
comp26291_c0_seq1	sc5a8_xenlasodium-coupled monocarboxylate transporter 1 os=xenopus laevis gn=slc5a8 pe=2 sv=1	-4.6293	0.0414
comp2919_c0_seq3	---NA---	-4.5851	0.0261
comp29355_c0_seq1	casp1_spofrcaspase-1 os=spodoptera frugiperda pe=1 sv=1	8.3396	0.0414
comp2989_c0_seq1	---NA---	-4.7119	0.0198
comp30562_c0_seq5	---NA---	6.0505	0.0062
comp328_c7_seq2	---NA---	7.6194	0.04
comp328_c7_seq7	---NA---	7.6191	0.0397
comp330_c0_seq3	---NA---	-10.6998	0.0003
comp330_c0_seq8	---NA---	-10.6467	0.0002
comp330_c0_seq9	---NA---	-10.4954	0.0008
comp33707_c0_seq1	---NA---	-11.1452	0.0128
comp3624_c0_seq1	---NA---	-8.5947	0.0321
comp36872_c0_seq2	---NA---	8.5792	0.0023
comp3727_c0_seq1	---NA---	-6.1458	0.0261
comp3763_c2_seq1	tcp4_caeel rna polymerase ii transcriptional coactivator os=caenorhabditis elegans gn= pe=2 sv=1	-5.4922	0.0427
comp428_c0_seq10	---NA---	-7.9622	0.0168
comp428_c0_seq3	---NA---	-7.9084	0.0025
comp428_c0_seq6	---NA---	-8.8919	0.0004
comp428_c0_seq8	---NA---	-6.6003	0.0441
comp4516_c0_seq1	---NA---	-10.6183	0.0055
comp4516_c0_seq12	---NA---	-11.4269	0.0038
comp4516_c0_seq8	---NA---	-8.6471	0.0084
comp48742_c0_seq1	---NA---	11.3752	0.0036
comp503_c0_seq2	cd69_mouseearly activation antigen cd69 os=mus musculus gn=cd69 pe=2 sv=1	-7.4592	0.0297
comp5561_c0_seq1	LYS_RUDPHRecName: Full=Invertebrate-type lysozyme; AltName: Full=1,4-beta-N-acetylmuramidase; AltName: Full=Destabilase; Flags: Precursor	10.7388	0.0175
comp5565_c0_seq1	---NA---	9.0506	0.0065
comp5565_c0_seq10	---NA---	8.3348	0.0186
comp5565_c0_seq11	---NA---	9.5124	0.0261
comp5565_c0_seq2	---NA---	12.4261	0.0023
comp5565_c0_seq4	---NA---	8.6126	0.0098
comp5565_c0_seq5	---NA---	11.966	0.0053
comp5565_c0_seq8	---NA---	10.0734	0.0045
comp582_c0_seq3	---NA---	-10.8134	0.003
comp582_c0_seq4	---NA---	-11.1786	0.0022
comp604_c0_seq3	vwde_humanvon willebrand factor d and egf domain-containing protein os=homo sapiens gn=vwde pe=2 sv=4	-7.3996	0.0106
comp6376_c0_seq1	---NA---	-8.6831	0.0067
comp6687_c0_seq1	cbs_macfacystathionine beta-synthase os=macaca fascicularis gn=cbs pe=2 sv=3	4.7568	0.0145
comp6860_c0_seq1	---NA---	-9.6891	0.0023
comp7114_c0_seq1	---NA---	12.3729	0.003
comp7114_c0_seq10	---NA---	12.3395	0.0053
comp7114_c0_seq11	---NA---	11.7315	0.0047
comp7114_c0_seq2	---NA---	11.7511	0.0038
comp7114_c0_seq3	---NA---	11.005	0.0055
comp826_c0_seq12	ici_lumtechymotrypsin inhibitor os=lumbricus terrestris pe=1 sv=2	-9.5449	0.0025
comp826_c0_seq4	ici1_phaansubtilisin inhibitor 1 os=phaseolus angularis pe=1 sv=1	-9.7658	0.0016
comp826_c0_seq6	ici_lumtechymotrypsin inhibitor os=lumbricus terrestris pe=1 sv=2	-9.1341	0.0067
comp826_c0_seq9	ici1_phaansubtilisin inhibitor 1 os=phaseolus angularis pe=1 sv=1	-9.5458	0.0023
comp847_c0_seq3	pdia6_caeelprobable protein disulfide-isomerase a6 os=caenorhabditis elegans gn=tag-320 pe=2 sv=1	-8.8229	0.0022
comp847_c0_seq7	pdia6_caeelprobable protein disulfide-isomerase a6 os=caenorhabditis elegans gn=tag-320 pe=2 sv=1	-8.6891	0.0055

## Sheet: PVP_NP_large
SeqID_BSA	Seq_Description	PVP_large_logFC	PVP_large_FDR
comp2509_c0_seq1	---NA---	7.4992	0.0023
comp2509_c0_seq2	---NA---	7.5966	0.009
comp1129_c0_seq62	---NA---	5.1553	0.0429
comp2031_c0_seq2	---NA---	-10.9657	0.0429
comp435_c0_seq1	---NA---	-7.5713	0.0429
comp688_c0_seq4	---NA---	7.271	0.0429
comp17335_c0_seq1	CR063_HUMANUncharacterized protein C18orf63 OS=Homo sapiens GN=C18orf63 PE=2 SV=2	6.2117	0.0429
comp19884_c0_seq2	extracellular exo-alpha-L-arabinofuranosidase	-11.2232	0.0429
comp1134_c0_seq3	---NA---	-7.3659	0.0493

## Sheet: PVP_Ag_low
SeqID_BSA	Seq_Description	PVP_Agion_low_logFC	PVP_Agion_low_FDR
comp142_c4_seq22	---NA---	13.5209	0.0183

## Sheet: PVP_Ag_high
SeqID_BSA	Seq_Description	PVP_Agion_high_logFC	PVP_Agion_high_FDR
comp2577_c0_seq13	---NA---	7.237	0.0123
comp974_c1_seq224	hypothetical protein CAPTEDRAFT_123060, partial	-8.407	0.0123
comp2621_c1_seq2	---NA---	-8.1492	0.0123
comp36872_c0_seq2	---NA---	8.4316	0.019
comp974_c1_seq11	hypothetical protein CAPTEDRAFT_123060, partial	-7.848	0.0197
comp688_c0_seq4	---NA---	7.2112	0.0508
comp6687_c0_seq3	cbs_macfacystathionine beta-synthase os=macaca fascicularis gn=cbs pe=2 sv=3	4.8142	0.0508
comp3629_c0_seq2	---NA---	7.502	0.0508
comp974_c1_seq14	hypothetical protein CAPTEDRAFT_123060, partial	-7.8801	0.0508
comp18490_c0_seq1	casp7_mousecaspase-7 os=mus musculus gn=casp7 pe=1 sv=2	9.8505	0.0523
comp10700_c0_seq1	---NA---	11.8426	0.0544
comp24660_c0_seq1	hdc_dromeheadcase protein os=drosophila melanogaster gn=hdc pe=1 sv=2	7.0152	0.0544
comp6687_c0_seq1	cbs_macfacystathionine beta-synthase os=macaca fascicularis gn=cbs pe=2 sv=3	4.8229	0.0544
comp33707_c0_seq1	---NA---	-11.1452	0.0544
comp37096_c0_seq1	---NA---	-9.3277	0.0564
comp76859_c0_seq1	hypothetical protein CAPTEDRAFT_124321, partial	-5.6812	0.0568
