# Supplementary material for: Surface coating and particle size are main factors explaining the transcriptome-wide responses of the earthwormLumbricus rubellusto silver nanoparticles
Source: Royal Society of Chemistry journal article supplement (doi:10.1039/c9en01144g), 2020-01-01
Supplement: c9en01144g4.xlsx [file c9en01144g4.xlsx]

## Sheet: Sheet1
Supplementary file 4 significantly over represented Gene Ontology terms per AgNP medium size treatment
FDR: false discovery rate corrected p-value, Nr test: number of significantly regulated genes belonging to the particular GO term, NrReference: number of genes potentially available in the assembly assigned to a particular GO term
BSA medium								Chi medium									PVP medium
GO ID	GO Name	GO Category	FDR	P-Value	Nr Test	Nr Reference		GO ID	GO Name	GO Category	FDR	P-Value	Nr Test	Nr Reference			GO ID	GO Name	GO Category	FDR	P-Value	Nr Test	Nr Reference
GO:0070469	respiratory chain	CELLULAR_COMPONENT	2.94978e-09	2.12047e-13	12	30		GO:0043418	homocysteine catabolic process	BIOLOGICAL_PROCESS	0.000250099	1.07871e-07	3	1			GO:0051917	regulation of fibrinolysis	BIOLOGICAL_PROCESS	3.96502e-13	2.85171e-17	7	6
GO:0022900	electron transport chain	BIOLOGICAL_PROCESS	1.14668e-08	1.6486e-12	13	49		GO:0009093	cysteine catabolic process	BIOLOGICAL_PROCESS	0.000250099	1.07871e-07	3	1			GO:0019897	extrinsic component of plasma membrane	CELLULAR_COMPONENT	2.26546e-09	2.11816e-12	7	45
GO:0015078	proton transmembrane transporter activity	MOLECULAR_FUNCTION	4.61844e-06	1.14188e-09	13	89		GO:0046439	L-cysteine metabolic process	BIOLOGICAL_PROCESS	0.000250099	1.07871e-07	3	1			GO:2001233	regulation of apoptotic signaling pathway	BIOLOGICAL_PROCESS	1.44982e-06	1.78109e-09	7	126
GO:0050136	NADH dehydrogenase (quinone) activity	MOLECULAR_FUNCTION	4.61844e-06	1.66e-09	8	19		GO:0070814	hydrogen sulfide biosynthetic process	BIOLOGICAL_PROCESS	0.000250099	1.07871e-07	3	1			GO:0007162	negative regulation of cell adhesion	BIOLOGICAL_PROCESS	1.44982e-06	1.87693e-09	7	127
GO:0008137	NADH dehydrogenase (ubiquinone) activity	MOLECULAR_FUNCTION	4.61844e-06	1.66e-09	8	19		GO:0019448	L-cysteine catabolic process	BIOLOGICAL_PROCESS	0.000250099	1.07871e-07	3	1			GO:0031099	regeneration	BIOLOGICAL_PROCESS	1.14576e-05	1.5657e-08	6	98
GO:0045333	cellular respiration	BIOLOGICAL_PROCESS	7.09177e-06	3.05877e-09	11	61		GO:0019346	transsulfuration	BIOLOGICAL_PROCESS	0.000250099	1.07871e-07	3	1			GO:0001934	positive regulation of protein phosphorylation	BIOLOGICAL_PROCESS	2.26114e-05	3.74038e-08	8	309
GO:0003954	NADH dehydrogenase activity	MOLECULAR_FUNCTION	1.11856e-05	5.62857e-09	8	23		GO:0004122	cystathionine beta-synthase activity	MOLECULAR_FUNCTION	0.000664568	4.29956e-07	3	1			GO:0008236	serine-type peptidase activity	MOLECULAR_FUNCTION	2.51548e-05	4.34203e-08	7	204
GO:0006119	oxidative phosphorylation	BIOLOGICAL_PROCESS	1.68271e-05	9.67701e-09	8	25		GO:0050667	homocysteine metabolic process	BIOLOGICAL_PROCESS	0.000664568	4.29956e-07	3	1			GO:0043069	negative regulation of programmed cell death	BIOLOGICAL_PROCESS	0.000366919	8.97241e-07	8	474
GO:0022904	respiratory electron transport chain	BIOLOGICAL_PROCESS	6.17857e-05	3.99735e-08	8	31		GO:0070813	hydrogen sulfide metabolic process	BIOLOGICAL_PROCESS	0.000664568	4.29956e-07	3	1			GO:0009986	cell surface	CELLULAR_COMPONENT	0.00046861	1.31443e-06	7	343
GO:0042773	ATP synthesis coupled electron transport	BIOLOGICAL_PROCESS	0.000823133	5.91713e-07	6	18		GO:0006565	L-serine catabolic process	BIOLOGICAL_PROCESS	0.00135453	1.07108e-06	3	2			GO:0030198	extracellular matrix organization	BIOLOGICAL_PROCESS	0.000550557	1.58388e-06	7	353
GO:0004129	cytochrome-c oxidase activity	MOLECULAR_FUNCTION	0.00157293	1.58299e-06	6	22		GO:0000098	sulfur amino acid catabolic process	BIOLOGICAL_PROCESS	0.00135453	1.07108e-06	3	2			GO:0006935	chemotaxis	BIOLOGICAL_PROCESS	0.000658788	2.08477e-06	8	532
GO:0015002	heme-copper terminal oxidase activity	MOLECULAR_FUNCTION	0.00157293	1.58299e-06	6	22		GO:0009092	homoserine metabolic process	BIOLOGICAL_PROCESS	0.00247452	2.13459e-06	3	3			GO:0045935	positive regulation of nucleobase-containing compound metabolic process	BIOLOGICAL_PROCESS	0.000725219	2.45147e-06	8	544
GO:0016675	oxidoreductase activity, acting on a heme group of donors	MOLECULAR_FUNCTION	0.00157293	1.58299e-06	6	22		GO:0006534	cysteine metabolic process	BIOLOGICAL_PROCESS	0.0171911	1.73011e-05	3	8			GO:0010557	positive regulation of macromolecule biosynthetic process	BIOLOGICAL_PROCESS	0.000814846	2.87165e-06	8	556
GO:0016676	oxidoreductase activity, acting on a heme group of donors, oxygen as acceptor	MOLECULAR_FUNCTION	0.00157293	1.58299e-06	6	22		GO:0006563	L-serine metabolic process	BIOLOGICAL_PROCESS	0.0171911	1.73011e-05	3	8			GO:0031328	positive regulation of cellular biosynthetic process	BIOLOGICAL_PROCESS	0.000925415	3.39443e-06	8	569
GO:0098803	respiratory chain complex	CELLULAR_COMPONENT	0.00321265	3.63944e-06	6	26		GO:0009403	toxin biosynthetic process	BIOLOGICAL_PROCESS	0.0199854	2.29865e-05	3	9			GO:0009967	positive regulation of signal transduction	BIOLOGICAL_PROCESS	0.00139143	5.60416e-06	8	610
GO:0070069	cytochrome complex	CELLULAR_COMPONENT	0.00321265	3.69509e-06	4	5		GO:0009071	serine family amino acid catabolic process	BIOLOGICAL_PROCESS	0.0199854	2.29865e-05	3	9			GO:0005576	extracellular region	CELLULAR_COMPONENT	0.00139143	5.52278e-06	12	1558
GO:0015980	energy derivation by oxidation of organic compounds	BIOLOGICAL_PROCESS	0.00349581	4.27208e-06	11	134		GO:0004867	serine-type endopeptidase inhibitor activity	MOLECULAR_FUNCTION	0.026362	3.22158e-05	7	177			GO:0004867	serine-type endopeptidase inhibitor activity	MOLECULAR_FUNCTION	0.00236109	1.06983e-05	5	179
GO:0006091	generation of precursor metabolites and energy	BIOLOGICAL_PROCESS	0.00606588	7.84888e-06	14	236											GO:0010951	negative regulation of endopeptidase activity	BIOLOGICAL_PROCESS	0.00259577	1.19483e-05	4	85
GO:0005743	mitochondrial inner membrane	CELLULAR_COMPONENT	0.00755521	1.03191e-05	11	148											GO:0016477	cell migration	BIOLOGICAL_PROCESS	0.00808347	3.95337e-05	7	585
GO:0016655	oxidoreductase activity, acting on NAD(P)H, quinone or similar compound as acceptor	MOLECULAR_FUNCTION	0.0127212	1.82894e-05	8	77											GO:0048513	animal organ development	BIOLOGICAL_PROCESS	0.0113164	5.69729e-05	11	1667
GO:0045277	respiratory chain complex IV	CELLULAR_COMPONENT	0.0151759	2.29094e-05	3	2											GO:0000902	cell morphogenesis	BIOLOGICAL_PROCESS	0.0261075	0.000163359	7	737
GO:0019866	organelle inner membrane	CELLULAR_COMPONENT	0.0162915	2.8107e-05	11	166											GO:0008283	cell population proliferation	BIOLOGICAL_PROCESS	0.0275516	0.000174377	7	745
GO:0046034	ATP metabolic process	BIOLOGICAL_PROCESS	0.0162915	2.64603e-05	9	107											GO:0005102	signaling receptor binding	MOLECULAR_FUNCTION	0.0332267	0.000224634	7	777
GO:0006120	mitochondrial electron transport, NADH to ubiquinone	BIOLOGICAL_PROCESS	0.0162915	2.78409e-05	4	10											GO:0045454	cell redox homeostasis	BIOLOGICAL_PROCESS	0.0390655	0.000272537	3	77
GO:0015077	monovalent inorganic cation transmembrane transporter activity	MOLECULAR_FUNCTION	0.0182391	3.27783e-05	13	235											GO:0050793	regulation of developmental process	BIOLOGICAL_PROCESS	0.0480118	0.000341856	8	1105
GO:0031966	mitochondrial membrane	CELLULAR_COMPONENT	0.0243161	4.54473e-05	13	243
GO:0009205	purine ribonucleoside triphosphate metabolic process	BIOLOGICAL_PROCESS	0.0274073	5.40715e-05	9	118
GO:0009126	purine nucleoside monophosphate metabolic process	BIOLOGICAL_PROCESS	0.0274073	6.10758e-05	9	120
GO:0009167	purine ribonucleoside monophosphate metabolic process	BIOLOGICAL_PROCESS	0.0274073	6.10758e-05	9	120
GO:0009144	purine nucleoside triphosphate metabolic process	BIOLOGICAL_PROCESS	0.0274073	6.10758e-05	9	120
GO:0009199	ribonucleoside triphosphate metabolic process	BIOLOGICAL_PROCESS	0.0274073	5.74838e-05	9	119
GO:0009161	ribonucleoside monophosphate metabolic process	BIOLOGICAL_PROCESS	0.0281936	6.48549e-05	9	121
GO:0009123	nucleoside monophosphate metabolic process	BIOLOGICAL_PROCESS	0.0290145	6.88288e-05	9	122
GO:0009141	nucleoside triphosphate metabolic process	BIOLOGICAL_PROCESS	0.0335503	8.20006e-05	9	125
GO:0005740	mitochondrial envelope	CELLULAR_COMPONENT	0.0372745	9.37825e-05	13	262
GO:0042775	mitochondrial ATP synthesis coupled electron transport	BIOLOGICAL_PROCESS	0.0395124	0.000102253	4	15
GO:0000220	vacuolar proton-transporting V-type ATPase, V0 domain	CELLULAR_COMPONENT	0.0468155	0.000124518	3	5
