# Supplementary material for: Surface coating and particle size are main factors explaining the transcriptome-wide responses of the earthwormLumbricus rubellusto silver nanoparticles
Source: Royal Society of Chemistry journal article supplement (doi:10.1039/c9en01144g), 2020-01-01
Supplement: c9en01144g5.xlsx [file c9en01144g5.xlsx]

## Sheet: BSA
BSA
Small		Medium		Large
Great	less	great	less	great	less
ko04014 Ras signaling pathway	ko01120 Microbial metabolism in diverse environments	ko04360 Axon guidance	ko03010 Ribosome	ko04360 Axon guidance	ko03010 Ribosome
ko04722 Neurotrophin signaling pathway	ko03010 Ribosome	ko04012 ErbB signaling pathway	ko04146 Peroxisome	ko04662 B cell receptor signaling pathway	ko04146 Peroxisome
ko04144 Endocytosis	ko04146 Peroxisome	ko04062 Chemokine signaling pathway	ko01212 Fatty acid metabolism	ko04919 Thyroid hormone signaling pathway	ko01120 Microbial metabolism in diverse environments
ko04810 Regulation of actin cytoskeleton	ko01110 Biosynthesis of secondary metabolites	ko04666 Fc gamma R-mediated phagocytosis	ko01120 Microbial metabolism in diverse environments	ko04015 Rap1 signaling pathway	ko01212 Fatty acid metabolism
ko04970 Salivary secretion	ko00010 Glycolysis / Gluconeogenesis	ko04662 B cell receptor signaling pathway	ko00590 Arachidonic acid metabolism	ko04062 Chemokine signaling pathway	ko03030 DNA replication
ko04912 GnRH signaling pathway	ko00620 Pyruvate metabolism	ko04150 mTOR signaling pathway	ko03030 DNA replication	ko04745 Phototransduction - fly	ko00480 Glutathione metabolism
ko04012 ErbB signaling pathway	ko00280 Valine, leucine and isoleucine degradation	ko04010 MAPK signaling pathway		ko04370 VEGF signaling pathway	ko00280 Valine, leucine and isoleucine degradation
ko04210 Apoptosis	ko00480 Glutathione metabolism	ko04810 Regulation of actin cytoskeleton		ko04070 Phosphatidylinositol signaling system	ko03008 Ribosome biogenesis in eukaryotes
ko04010 MAPK signaling pathway	ko04080 Neuroactive ligand-receptor interaction	ko04722 Neurotrophin signaling pathway		ko04970 Salivary secretion	ko04612 Antigen processing and presentation
ko04070 Phosphatidylinositol signaling system	ko01212 Fatty acid metabolism	ko04721 Synaptic vesicle cycle		ko04720 Long-term potentiation	ko03040 Spliceosome
ko04725 Cholinergic synapse		ko04068 FoxO signaling pathway		ko04012 ErbB signaling pathway	ko04113 Meiosis - yeast
ko04011 MAPK signaling pathway - yeast		ko04210 Apoptosis		ko04020 Calcium signaling pathway	ko03050 Proteasome
ko04510 Focal adhesion		ko04370 VEGF signaling pathway		ko04014 Ras signaling pathway	ko04111 Cell cycle - yeast
ko04013 MAPK signaling pathway - fly		ko04917 Prolactin signaling pathway		ko04722 Neurotrophin signaling pathway	ko00071 Fatty acid degradation
		ko04015 Rap1 signaling pathway		ko04971 Gastric acid secretion	ko00330 Arginine and proline metabolism
		ko04140 Regulation of autophagy		ko04730 Long-term depression	ko03320 PPAR signaling pathway
		ko04660 T cell receptor signaling pathway		ko04150 mTOR signaling pathway	ko00510 N-Glycan biosynthesis
		ko04510 Focal adhesion		ko04010 MAPK signaling pathway
		ko04014 Ras signaling pathway		ko04666 Fc gamma R-mediated phagocytosis
				ko04724 Glutamatergic synapse
				ko04810 Regulation of actin cytoskeleton
				ko04912 GnRH signaling pathway
				ko04068 FoxO signaling pathway
				ko04921 Oxytocin signaling pathway
				ko04550 Signaling pathways regulating pluripotency of stem cells
				ko04917 Prolactin signaling pathway
				ko04510 Focal adhesion
				ko04910 Insulin signaling pathway

## Sheet: Chitosan
Chitosan
Small		Medium		Large
Great	less	great	less	great	less
ko03010 Ribosome	ko04070 Phosphatidylinositol signaling system	ko04514 Cell adhesion molecules (CAMs)	ko03010 Ribosome	ko03010 Ribosome	ko04070 Phosphatidylinositol signaling system
	ko04391 Hippo signaling pathway - fly		ko02010 ABC transporters	ko00190 Oxidative phosphorylation	ko00562 Inositol phosphate metabolism
	ko00562 Inositol phosphate metabolism		ko04115 p53 signaling pathway	ko04142 Lysosome	ko04014 Ras signaling pathway
	ko04062 Chemokine signaling pathway		ko01212 Fatty acid metabolism		ko02010 ABC transporters
	ko04713 Circadian entrainment				ko04391 Hippo signaling pathway - fly
	ko04961 Endocrine and other factor-regulated calcium reabsorption				ko04062 Chemokine signaling pathway
	ko04115 p53 signaling pathway				ko04015 Rap1 signaling pathway
	ko04530 Tight junction				ko04010 MAPK signaling pathway
	ko04015 Rap1 signaling pathway				ko04713 Circadian entrainment
	ko04014 Ras signaling pathway				ko04510 Focal adhesion
	ko04144 Endocytosis				ko04530 Tight junction
	ko04024 cAMP signaling pathway				ko04722 Neurotrophin signaling pathway
	ko04151 PI3K-Akt signaling pathway				ko04750 Inflammatory mediator regulation of TRP channels
	ko04810 Regulation of actin cytoskeleton				ko04024 cAMP signaling pathway
	ko02010 ABC transporters				ko04912 GnRH signaling pathway
	ko04020 Calcium signaling pathway				ko04970 Salivary secretion
	ko04971 Gastric acid secretion				ko04020 Calcium signaling pathway
	ko04510 Focal adhesion				ko04144 Endocytosis
					ko04810 Regulation of actin cytoskeleton
					ko04725 Cholinergic synapse
					ko04740 Olfactory transduction
					ko04961 Endocrine and other factor-regulated calcium reabsorption
					ko04012 ErbB signaling pathway
					ko04664 Fc epsilon RI signaling pathway

## Sheet: PVP
PVP
Small		Medium		Large
Great	less	great	less	great	less
ko01120 Microbial metabolism in diverse environments	ko03010 Ribosome			ko00600 Sphingolipid metabolism	ko04064 NF-kappa B signaling pathway
ko00100 Steroid biosynthesis	ko00190 Oxidative phosphorylation			ko04974 Protein digestion and absorption	ko00240 Pyrimidine metabolism
ko01130 Biosynthesis of antibiotics	ko00240 Pyrimidine metabolism
ko01110 Biosynthesis of secondary metabolites	ko03008 Ribosome biogenesis in eukaryotes
ko04512 ECM-receptor interaction	ko03050 Proteasome
ko04745 Phototransduction - fly
ko00010 Glycolysis / Gluconeogenesis
ko04261 Adrenergic signaling in cardiomyocytes
ko00620 Pyruvate metabolism
ko04750 Inflammatory mediator regulation of TRP channels
ko04961 Endocrine and other factor-regulated calcium reabsorption
ko04022 cGMP-PKG signaling pathway
ko04728 Dopaminergic synapse
